# Supplementary material
Source: Research Square preprint supplement (doi:10.21203/rs.3.rs-8902969/v1)
Supplement: Supplementary file 1 [file 191c6a44610328949d433aab.xlsx]

## Sheet: Stoolsamples chamaleons
Date	ZIP Code	Number of animals (1=Singel, 2=Grp)	Husbandry (Terrarium 1, Outdoors 0)	Age	Sex (m=1, w=0)	lenght (cm)	mass (kg)	Private/Vet/Zoo	Sample	F. pardialis	F. verrucosus	F. oustaleti	F. lateralis	C. calyptratus	C. cristatus	C. dilepis	T. melleri	T. hoehnelii	Kinyongia boehmei	Calumna parsonii	Rampholeon acuminatus	B. thamnobates	Bradypodion setaroi	Bradypodion fischeri	Trioceros jacksonii	Trioceros johnstoni	Trioceros sternfeldi	Triocerus deremensis	T. ellioti	T. Bitaeniatus	Triceros rudis	Gonocephalus chamaeleontinus	ch. j. xantholophus	unknown species	negative	Oxy Pos	Oxyurids	Physalopteroides (Physaloptera ortleppi) pos	Physalopteroides (Physaloptera ortleppi)	Isospora jaracimmani pos	Isospora jaracimmani	Isospora sp. Pos	Isospora sp.	Eimeria sp. Pos	Eimeria sp.	unsp.coccidia pos	unsp. Coccidia	Ascarids	Ascarids2
2012-01-02	30459	1	*	juvenile	0	*	*	Private	Fecal sample	0	0	0	0	1	0	0	0	0	0	0	0	0	0	0	0	0	0	0	0	0	0	0	0	0	1	0	0		0		0		0		0		0		0
2012-01-02	13509	*	*	adult	1	*	*	Private	Fecal sample	1	0	0	0	0	0	0	0	0	0	0	0	0	0	0	0	0	0	0	0	0	0	0	0	0	1	0	0		0		0		0		0		0		0
2012-01-03	13581	1	1	juvenile	*	11	*	Private	Fecal sample	1	0	0	0	0	0	0	0	0	0	0	0	0	0	0	0	0	0	0	0	0	0	0	0	0	0	0	0		0		0		0		0		0		0
2012-01-04	17291	1	1	adult	1	20	0.05	Private	Fecal sample	0	0	0	0	1	0	0	0	0	0	0	0	0	0	0	0	0	0	0	0	0	0	0	0	0	1	0	0		0		0		0		0		0		0
2012-01-05	2957	2	1	*	1	*	*	Private	Fecal sample	1	0	0	0	0	0	0	0	0	0	0	0	0	0	0	0	0	0	0	0	0	0	0	0	0	0	0	0		0		0		0		0		0		0
2012-01-06	13581	1	1	juvenile	0	15	0.6	Private	Fecal sample	1	0	0	0	0	0	0	0	0	0	0	0	0	0	0	0	0	0	0	0	0	0	0	0	0	1	0	0		0		0		0		0		0		0
2012-01-06	13581	1	1	juvenile	0	15	0.7	Private	Fecal sample	1	0	0	0	0	0	0	0	0	0	0	0	0	0	0	0	0	0	0	0	0	0	0	0	0	1	0	0		0		0		0		0		0		0
2012-01-06	2957	1	1	*	1	*	*	Private	Fecal sample	0	0	1	0	0	0	0	0	0	0	0	0	0	0	0	0	0	0	0	0	0	0	0	0	0	0	0	0		0		0		0		0		0		0
2012-01-07	45897	1	1	adult	1	*	0.15	Private	Fecal sample	0	0	0	0	1	0	0	0	0	0	0	0	0	0	0	0	0	0	0	0	0	0	0	0	0	0	0	0		0		0		0		0		0		0
2012-01-10	15745	1	*	adult	1	*	*	Private	Fecal sample	1	0	0	0	0	0	0	0	0	0	0	0	0	0	0	0	0	0	0	0	0	0	0	0	0	1	0	0		0		0		0		0		0		0
2012-01-11	21745	1	*	adult	1	*	*	Private	Fecal sample	0	0	0	0	1	0	0	0	0	0	0	0	0	0	0	0	0	0	0	0	0	0	0	0	0	0	1	1		0		0		0		0		0		0
2012-01-11	45897	1	*	*	1	*	*	Private	Fecal sample	0	0	0	0	0	0	0	1	0	0	0	0	0	0	0	0	0	0	0	0	0	0	0	0	0	1	0	0		0		0		0		0		0		0
2012-01-12	80539	1	1	*	1	*	*	Veterinarian	Fecal sample	0	0	0	0	1	0	0	0	0	0	0	0	0	0	0	0	0	0	0	0	0	0	0	0	0	0	0	0		0		0		0		0		0		0
2012-01-16	95361	1	*	*	0	*	*	Private	Fecal sample	1	0	0	0	0	0	0	0	0	0	0	0	0	0	0	0	0	0	0	0	0	0	0	0	0	1	0	0		0		0		0		0		0		0
2012-01-17	72175	1	1	adult	1	24.5	0.08	Private	Fecal sample	0	0	0	0	0	0	0	0	0	0	0	0	0	0	0	1	0	0	0	0	0	0	0	0	0	1	0	0		0		0		0		0		0		0
2012-01-19	2957	*	*	*	*	*	*	Private	Fecal sample	1	0	0	0	0	0	0	0	0	0	0	0	0	0	0	0	0	0	0	0	0	0	0	0	0	1	0	0		0		0		0		0		0		0
2012-01-24	29223	*	*	adult	1	*	*	Zoo	Fecal sample	0	0	0	0	0	0	0	1	0	0	0	0	0	0	0	0	0	0	0	0	0	0	0	0	0	1	0	0		0		0		0		0		0		0
2012-01-24	7333	*	*	*	*	*	*	Private	Fecal sample	0	0	0	0	1	0	0	0	0	0	0	0	0	0	0	0	0	0	0	0	0	0	0	0	0	0	1	2		0		0		0		0		0		0
2012-01-24	57433	1	1	adult	1	40	0.14	Private	Fecal sample	1	0	0	0	0	0	0	0	0	0	0	0	0	0	0	0	0	0	0	0	0	0	0	0	0	1	0	0		0		0		0		0		0		0
2012-01-25	68259	1	1	adult	1	*	*	Private	Fecal sample	0	0	0	0	1	0	0	0	0	0	0	0	0	0	0	0	0	0	0	0	0	0	0	0	0	0	0	0		0		0		0		0		0		0
2012-01-31	68259	1	1	adult	1	*	*	Private	Fecal sample	0	0	0	0	1	0	0	0	0	0	0	0	0	0	0	0	0	0	0	0	0	0	0	0	0	1	0	0		0		0		0		0		0		0
2012-02-01	53859	1	1	*	1	60	*	Private	Fecal sample	0	0	0	0	1	0	0	0	0	0	0	0	0	0	0	0	0	0	0	0	0	0	0	0	0	0	1	2		0		0		0		0		0		0
2012-02-04	68259	1	1	adult	0	*	*	Private	Fecal sample	0	0	0	0	1	0	0	0	0	0	0	0	0	0	0	0	0	0	0	0	0	0	0	0	0	1	0	0		0		0		0		0		0		0
2012-02-04	68259	1	1	adult	0	*	*	Private	Fecal sample	0	0	0	0	1	0	0	0	0	0	0	0	0	0	0	0	0	0	0	0	0	0	0	0	0	0	0	0		0		0		0		0		0		0
2012-02-07	8233	1	1	adult	1	40	0.1	Private	Fecal sample	1	0	0	0	0	0	0	0	0	0	0	0	0	0	0	0	0	0	0	0	0	0	0	0	0	1	0	0		0		0		0		0		0		0
2012-02-09	74909	1	1	adult	1	35	*	Private	Fecal sample	0	0	0	0	1	0	0	0	0	0	0	0	0	0	0	0	0	0	0	0	0	0	0	0	0	0	1	2		0		0		0		0		0		0
2012-02-16	66701	*	*	*	0	28	0.26	Private	Fecal sample	0	0	0	0	0	0	0	0	0	0	0	0	0	0	0	0	0	0	0	0	0	0	0	0	1	1	0	0		0		0		0		0		0		0
2012-02-17	21745	*	*	*	1	*	*	Private	Fecal sample	0	0	0	0	1	0	0	0	0	0	0	0	0	0	0	0	0	0	0	0	0	0	0	0	0	1	0	0		0		0		0		0		0		0
2012-02-17	66901	1	1	adult	1	40	0.18	Private	Fecal sample	0	0	0	0	1	0	0	0	0	0	0	0	0	0	0	0	0	0	0	0	0	0	0	0	0	0	1	2		0		0		0		0		0		0
2012-02-20	28205	*	*	*	1	*	*	Veterinarian	Fecal sample	0	0	0	0	1	0	0	0	0	0	0	0	0	0	0	0	0	0	0	0	0	0	0	0	0	1	0	0		0		0		0		0		0		0
2012-02-21	68259	*	*	adult	0	*	*	Private	Fecal sample	0	0	0	0	1	0	0	0	0	0	0	0	0	0	0	0	0	0	0	0	0	0	0	0	0	1	0	0		0		0		0		0		0		0
2012-02-24	28205	*	*	*	1	*	*	Veterinarian	Fecal sample	0	0	0	0	1	0	0	0	0	0	0	0	0	0	0	0	0	0	0	0	0	0	0	0	0	1	0	0		0		0		0		0		0		0
2012-02-28	66809	1	1	*	1	28	0.3	Private	Fecal sample	0	0	0	0	1	0	0	0	0	0	0	0	0	0	0	0	0	0	0	0	0	0	0	0	0	0	1	2		0		0		0		0		0		0
2012-03-05	28205	*	*	*	1	*	*	Veterinarian	Fecal sample	0	0	0	0	1	0	0	0	0	0	0	0	0	0	0	0	0	0	0	0	0	0	0	0	0	1	0	0		0		0		0		0		0		0
2012-03-12	63303	1	1	adult	1	30	*	Private	Fecal sample	0	0	0	0	1	0	0	0	0	0	0	0	0	0	0	0	0	0	0	0	0	0	0	0	0	0	1	1		0		0		0		0		0		0
2012-03-15	17291	1	1	juvenile	0	7	0.01	Private	Fecal sample	0	0	0	0	1	0	0	0	0	0	0	0	0	0	0	0	0	0	0	0	0	0	0	0	0	1	0	0		0		0		0		0		0		0
2012-03-15	30519	1	1	adult	1	17	*	Private	Fecal sample	1	0	0	0	0	0	0	0	0	0	0	0	0	0	0	0	0	0	0	0	0	0	0	0	0	0	0	0		0		0		0		0		0		0
2012-03-23	4736	2	1	*	1	*	*	Private	Fecal sample	1	0	0	0	0	0	0	0	0	0	0	0	0	0	0	0	0	0	0	0	0	0	0	0	0	0	0	0		0		0		0		0		0		0
2012-03-23	30855	*	*	juvenile	1	*	*	Private	Fecal sample	1	0	0	0	0	0	0	0	0	0	0	0	0	0	0	0	0	0	0	0	0	0	0	0	0	0	0	0		0		0		0	1	3		0		0
2012-03-23	28205	*	*	*	0	*	*	Veterinarian	Fecal sample	0	0	0	0	1	0	0	0	0	0	0	0	0	0	0	0	0	0	0	0	0	0	0	0	0	0	1	1		0		0		0		0		0		0
2012-03-26	86529	*	*	adult	*	*	0.167	Private	Fecal sample	1	0	0	0	0	0	0	0	0	0	0	0	0	0	0	0	0	0	0	0	0	0	0	0	0	1	0	0		0		0		0		0		0		0
2012-03-27	31535	*	*	adult	0	*	*	Private	Fecal sample	0	0	0	0	0	0	1	0	0	0	0	0	0	0	0	0	0	0	0	0	0	0	0	0	0	0	0	0		0		0	1	2		0		0		0
2012-03-27	45897	*	*	*	1	*	*	Private	Fecal sample	0	0	0	0	1	0	0	0	0	0	0	0	0	0	0	0	0	0	0	0	0	0	0	0	0	0	1	1		0		0		0		0		0		0
2012-03-27	40822	*	*	adult	1	*	*	Private	Fecal sample	0	0	0	0	1	0	0	0	0	0	0	0	0	0	0	0	0	0	0	0	0	0	0	0	0	1	0	0		0		0		0		0		0		0
2012-03-27	31535	*	*	adult	0	*	*	Private	Fecal sample	0	0	0	0	0	0	1	0	0	0	0	0	0	0	0	0	0	0	0	0	0	0	0	0	0	0	0	0		0		0	1	2		0		0		0
2012-03-30	30853	*	*	adult	1	*	*	Private	Fecal sample	0	0	0	0	1	0	0	0	0	0	0	0	0	0	0	0	0	0	0	0	0	0	0	0	0	0	1	2		0		0		0		0		0		0
2012-04-03	13509	1	1	adult	1	*	*	Private	Fecal sample	1	0	0	0	0	0	0	0	0	0	0	0	0	0	0	0	0	0	0	0	0	0	0	0	0	1	0	0		0		0		0		0		0		0
2012-04-03	88400	1	1	adult	1	40	*	Private	Fecal sample	0	0	0	0	1	0	0	0	0	0	0	0	0	0	0	0	0	0	0	0	0	0	0	0	0	0	1	2		0		0		0		0		0		0
2012-04-05	1968	1	1	juvenile	1	*	*	Private	Fecal sample	0	0	0	0	0	0	1	0	0	0	0	0	0	0	0	0	0	0	0	0	0	0	0	0	0	1	0	0		0		0		0		0		0		0
2012-04-05	4838	2	*	juvenile	*	*	*	Private	Fecal sample	1	0	0	0	0	0	0	0	0	0	0	0	0	0	0	0	0	0	0	0	0	0	0	0	0	1	0	0		0		0		0		0		0		0
2012-04-05	4838	2	*	juvenile	*	*	*	Private	Fecal sample	1	0	0	0	0	0	0	0	0	0	0	0	0	0	0	0	0	0	0	0	0	0	0	0	0	0	0	0		0		0		0		0		0		0
2012-04-05	4838	2	*	juvenile	*	*	*	Private	Fecal sample	1	0	0	0	0	0	0	0	0	0	0	0	0	0	0	0	0	0	0	0	0	0	0	0	0	0	0	0		0		0		0		0		0		0
2012-04-05	4838	1	*	*	*	*	*	Private	Fecal sample	1	0	0	0	0	0	0	0	0	0	0	0	0	0	0	0	0	0	0	0	0	0	0	0	0	0	0	0		0		0		0	1	1		0		0
2012-04-10	45897	1	*	*	1	*	*	Private	Fecal sample	1	0	0	0	0	0	0	0	0	0	0	0	0	0	0	0	0	0	0	0	0	0	0	0	0	1	0	0		0		0		0		0		0		0
2012-04-11	80687	1	1	adult	1	28	0.07	Private	Fecal sample	1	0	0	0	0	0	0	0	0	0	0	0	0	0	0	0	0	0	0	0	0	0	0	0	0	1	0	0		0		0		0		0		0		0
2012-04-12	28205	1	*	*	0	*	*	Veterinarian	Fecal sample	1	0	0	0	0	0	0	0	0	0	0	0	0	0	0	0	0	0	0	0	0	0	0	0	0	1	0	0		0		0		0		0		0		0
2012-04-12	97508	1	1	adult	*	36	0.16	Private	Fecal sample	0	0	0	0	1	0	0	0	0	0	0	0	0	0	0	0	0	0	0	0	0	0	0	0	0	1	0	0		0		0		0		0		0		0
2012-04-12	47533	1	1	adult	1	25	0.09	Private	Fecal sample	1	0	0	0	0	0	0	0	0	0	0	0	0	0	0	0	0	0	0	0	0	0	0	0	0	0	0	0		0		0		0		0		0		0
2012-04-16	86529	*	*	adult	1	*	0.11	Private	Fecal sample	1	0	0	0	0	0	0	0	0	0	0	0	0	0	0	0	0	0	0	0	0	0	0	0	0	0	0	0		0		0	1	1		0		0		0
2012-04-17	31535	*	*	adult	0	*	*	Private	Fecal sample	0	0	0	0	0	0	1	0	0	0	0	0	0	0	0	0	0	0	0	0	0	0	0	0	0	0	0	0		0		0		0		0		0		0
2012-04-17	45897	*	*	*	1	*	*	Private	Fecal sample	0	0	0	0	1	0	0	0	0	0	0	0	0	0	0	0	0	0	0	0	0	0	0	0	0	0	1	1		0		0		0		0		0		0
2012-04-18	31084	*	*	*	*	*	0.09	Private	Fecal sample	0	0	0	0	0	0	0	1	0	0	0	0	0	0	0	0	0	0	0	0	0	0	0	0	0	1	0	0		0		0		0		0		0		0
2012-04-19	53859	1	1	adult	0	17	*	Private	Fecal sample	1	0	0	0	0	0	0	0	0	0	0	0	0	0	0	0	0	0	0	0	0	0	0	0	0	1	0	0		0		0		0		0		0		0
2012-04-20	28205	1	*	*	0	*	*	Veterinarian	Fecal sample	1	0	0	0	0	0	0	0	0	0	0	0	0	0	0	0	0	0	0	0	0	0	0	0	0	0	1	2		0		0		0		0		0		0
2012-04-23	66052	1	1	juvenile	1	14	0.05	Private	Fecal sample	0	0	0	0	1	0	0	0	0	0	0	0	0	0	0	0	0	0	0	0	0	0	0	0	0	1	0	0		0		0		0		0		0		0
2012-04-24	28205	*	*	*	1	*	*	Veterinarian	Fecal sample	0	0	0	0	1	0	0	0	0	0	0	0	0	0	0	0	0	0	0	0	0	0	0	0	0	0	1	3		0		0		0		0		0		0
2012-04-26	29313	*	*	*	*	*	*	Private	Fecal sample	1	0	0	0	0	0	0	0	0	0	0	0	0	0	0	0	0	0	0	0	0	0	0	0	0	1	0	0		0		0		0		0		0		0
2012-05-03	66809	1	1	adult	1	*	0.3	Private	Fecal sample	0	0	0	0	1	0	0	0	0	0	0	0	0	0	0	0	0	0	0	0	0	0	0	0	0	1	0	0		0		0		0		0		0		0
2012-05-04	8359	*	*	adult	*	36	0.09	Private	Fecal sample	0	0	0	0	0	0	0	1	0	0	0	0	0	0	0	0	0	0	0	0	0	0	0	0	0	1	0	0		0		0		0		0		0		0
2012-05-10	66763	*	*	*	*	45	0.28	Zoo	Fecal sample	0	0	0	0	0	0	0	1	0	0	0	0	0	0	0	0	0	0	0	0	0	0	0	0	0	1	0	0		0		0		0		0		0		0
2012-05-10	66673	1	1	adult	1	36	0.13	Private	Fecal sample	0	0	0	0	1	0	0	0	0	0	0	0	0	0	0	0	0	0	0	0	0	0	0	0	0	1	0	0		0		0		0		0		0		0
2012-05-11	46052	1	1	juvenile	1	12	0.02	Private	Fecal sample	0	0	0	0	1	0	0	0	0	0	0	0	0	0	0	0	0	0	0	0	0	0	0	0	0	1	0	0		0		0		0		0		0		0
2012-05-14	75038	1	1	adult	1	20	*	Private	Fecal sample	0	0	0	0	0	0	0	0	0	0	0	0	0	0	0	0	0	0	0	0	0	0	0	0	1	1	0	0		0		0		0		0		0		0
2012-05-15	78315	*	*	juvenile	1	*	*	Private	Fecal sample	0	0	0	0	0	0	0	0	0	0	0	0	0	0	0	0	0	0	0	0	0	0	0	0	1	0	0	0		0	1	1		0		0		0		0
2012-05-18	53225	1	1	adult	1	30	*	Private	Fecal sample	1	0	0	0	0	0	0	0	0	0	0	0	0	0	0	0	0	0	0	0	0	0	0	0	0	1	0	0		0		0		0		0		0		0
2012-05-20	39128	1	1	juvenile	1	33	0.09	Private	Fecal sample	1	0	0	0	0	0	0	0	0	0	0	0	0	0	0	0	0	0	0	0	0	0	0	0	0	0	0	0		0		0	1	2		0		0		0
2012-05-24	55330	1	1	adult	1	25	0.03	Private	Fecal sample	0	0	0	0	1	0	0	0	0	0	0	0	0	0	0	0	0	0	0	0	0	0	0	0	0	1	0	0		0		0		0		0		0		0
2012-05-30	66693	1	1	adult	1	25	*	Private	Fecal sample	0	0	0	0	0	0	1	0	0	0	0	0	0	0	0	0	0	0	0	0	0	0	0	0	0	1	0	0		0		0		0		0		0		0
2012-06-04	86529	2	*	*	*	*	*	Private	Fecal sample	1	0	0	0	0	0	0	0	0	0	0	0	0	0	0	0	0	0	0	0	0	0	0	0	0	0	0	0		0		0	1	2		0		0		0
2012-06-04	59457	*	*	*	1	*	*	Private	Fecal sample	1	0	0	0	0	0	0	0	0	0	0	0	0	0	0	0	0	0	0	0	0	0	0	0	0	1	0	0		0		0		0		0		0		0
2012-06-05	30853	*	*	adult	1	*	*	Private	Fecal sample	0	0	0	0	1	0	0	0	0	0	0	0	0	0	0	0	0	0	0	0	0	0	0	0	0	1	0	0		0		0		0		0		0		0
2012-06-06	76829	1	1	adult	1	13	*	Private	Fecal sample	1	0	0	0	0	0	0	0	0	0	0	0	0	0	0	0	0	0	0	0	0	0	0	0	0	1	0	0		0		0		0		0		0		0
2012-06-08	28205	1	1	*	1	*	*	Veterinarian	Fecal sample	0	0	0	0	1	0	0	0	0	0	0	0	0	0	0	0	0	0	0	0	0	0	0	0	0	0	0	0		0		0		0		0		0		0
2012-06-08	28205	1	1	*	0	*	*	Veterinarian	Fecal sample	0	0	0	0	1	0	0	0	0	0	0	0	0	0	0	0	0	0	0	0	0	0	0	0	0	0	0	0		0		0		0		0		0		0
2012-06-08	76824	*	*	adult	1	13	*	Private	Fecal sample	1	0	0	0	0	0	0	0	0	0	0	0	0	0	0	0	0	0	0	0	0	0	0	0	0	1	0	0		0		0		0		0		0		0
2012-06-13	31855	2	1	juvenile	1.1	*	*	Private	Fecal sample	0	0	0	0	1	0	0	0	0	0	0	0	0	0	0	0	0	0	0	0	0	0	0	0	0	0	0	0		0	1	3		0		0		0		0
2012-06-14	2953	*	*	*	*	*	*	Private	Fecal sample	1	0	0	0	0	0	0	0	0	0	0	0	0	0	0	0	0	0	0	0	0	0	0	0	0	0	0	0		0		0		0		0		0		0
2012-06-14	45897	*	*	*	1	*	*	Private	Fecal sample	0	0	0	0	0	0	0	1	0	0	0	0	0	0	0	0	0	0	0	0	0	0	0	0	0	0	0	0		0		0		0		0		0		0
2012-06-14	45897	*	*	*	1	*	*	Private	Fecal sample	0	0	0	0	0	0	0	1	0	0	0	0	0	0	0	0	0	0	0	0	0	0	0	0	0	0	0	0		0		0		0		0		0		0
2012-06-18	45897	*	*	*	1	*	*	Private	Fecal sample	0	0	0	0	1	0	0	0	0	0	0	0	0	0	0	0	0	0	0	0	0	0	0	0	0	1	0	0		0		0		0		0		0		0
2012-06-21	45897	1	*	adult	*	*	*	Private	Fecal sample	1	0	0	0	0	0	0	0	0	0	0	0	0	0	0	0	0	0	0	0	0	0	0	0	0	1	0	0		0		0		0		0		0		0
2012-06-23	72213	1	*	adult	*	*	*	Private	Fecal sample	0	0	1	0	0	0	0	0	0	0	0	0	0	0	0	0	0	0	0	0	0	0	0	0	0	0	0	0	1	1		0		0		0		0		0
2012-06-25	10245	1	1	adult	1	35	*	Private	Fecal sample	0	0	0	0	0	0	0	0	0	0	0	0	0	0	0	0	0	0	0	0	0	0	0	0	1	1	0	0		0		0		0		0		0		0
2012-06-26	39128	1	1	juvenile	1	33	0.09	Private	Fecal sample	1	0	0	0	0	0	0	0	0	0	0	0	0	0	0	0	0	0	0	0	0	0	0	0	0	1	0	0		0		0		0		0		0		0
2012-06-28	53639	1	*	adult	0	*	*	Private	Fecal sample	1	0	0	0	0	0	0	0	0	0	0	0	0	0	0	0	0	0	0	0	0	0	0	0	0	1	0	0		0		0		0		0		0		0
2012-06-28	53639	1	1	*	1	*	*	Private	Fecal sample	1	0	0	0	0	0	0	0	0	0	0	0	0	0	0	0	0	0	0	0	0	0	0	0	0	0	0	0		0		0		0		0		0		0
2012-07-02	45897	*	*	*	1	*	*	Private	Fecal sample	0	0	0	0	1	0	0	0	0	0	0	0	0	0	0	0	0	0	0	0	0	0	0	0	0	1	0	0		0		0		0		0		0		0
2012-07-02	67376	1	*	adult	1	*	*	Private	Fecal sample	0	0	0	0	1	0	0	0	0	0	0	0	0	0	0	0	0	0	0	0	0	0	0	0	0	1	0	0		0		0		0		0		0		0
2012-07-06	72475	*	*	juvenile	1	*	*	Private	Fecal sample	1	0	0	0	0	0	0	0	0	0	0	0	0	0	0	0	0	0	0	0	0	0	0	0	0	0	1	1		0	1	1		0		0		0		0
2012-07-06	72475	*	*	*	*	*	*	Private	Fecal sample	1	0	0	0	0	0	0	0	0	0	0	0	0	0	0	0	0	0	0	0	0	0	0	0	0	0	0	0		0		0	1	2		0		0		0
2012-07-06	50735	*	*	*	*	*	*	Zoo	Fecal sample	1	0	0	0	0	0	0	0	0	0	0	0	0	0	0	0	0	0	0	0	0	0	0	0	0	0	1	2		0		0		0		0		0		0
2012-07-06	50735	*	*	*	*	*	*	Zoo	Fecal sample	1	0	0	0	0	0	0	0	0	0	0	0	0	0	0	0	0	0	0	0	0	0	0	0	0	1	0	0		0		0		0		0		0		0
2012-07-06	50735	*	*	*	*	*	*	Zoo	Fecal sample	1	0	0	0	0	0	0	0	0	0	0	0	0	0	0	0	0	0	0	0	0	0	0	0	0	1	0	0		0		0		0		0		0		0
2012-07-11	44442	*	*	adult	1	*	*	Private	Fecal sample	0	0	0	0	0	0	0	0	0	0	0	0	0	0	0	0	0	0	0	0	0	0	0	0	1	0	1	2		0		0		0		0		0		0
2012-07-12	30173	*	*	*	0	*	0.04	Private	Fecal sample	0	0	0	0	1	0	0	0	0	0	0	0	0	0	0	0	0	0	0	0	0	0	0	0	0	1	0	0		0		0		0		0		0		0
2012-07-13	14482	*	*	adult	1	*	0.15	Private	Fecal sample	0	0	0	0	1	0	0	0	0	0	0	0	0	0	0	0	0	0	0	0	0	0	0	0	0	0	1	2		0		0		0		0		0		0
2012-07-13	28205	*	*	*	1	*	*	Veterinarian	Fecal sample	0	0	0	0	1	0	0	0	0	0	0	0	0	0	0	0	0	0	0	0	0	0	0	0	0	1	0	0		0		0		0		0		0		0
2012-07-18	53757	*	*	juvenile	*	*	*	Private	Fecal sample	1	0	0	0	0	0	0	0	0	0	0	0	0	0	0	0	0	0	0	0	0	0	0	0	0	1	0	0		0		0		0		0		0		0
2012-07-18	74394	1	1	juvenile	*	5	*	Private	Fecal sample	0	0	0	0	0	0	0	0	0	0	0	0	0	0	0	0	0	0	0	0	0	0	0	0	1	1	0	0		0		0		0		0		0		0
2012-07-18	51381	1	1	adult	1	25	*	Private	Fecal sample	1	0	0	0	0	0	0	0	0	0	0	0	0	0	0	0	0	0	0	0	0	0	0	0	0	0	0	0		0		0		0		0		0		0
2012-07-18	2957	*	*	*	*	*	*	Private	Fecal sample	0	0	0	0	0	0	0	0	0	0	0	0	0	0	0	0	0	0	0	0	0	0	0	0	1	1	0	0		0		0		0		0		0		0
2012-07-19	86529	1	*	adult	1	*	0.14	Private	Fecal sample	1	0	0	0	0	0	0	0	0	0	0	0	0	0	0	0	0	0	0	0	0	0	0	0	0	1	0	0		0		0		0		0		0		0
2012-07-25	31855	2	1	juvenile	0	*	*	Private	Fecal sample	0	0	0	0	1	0	0	0	0	0	0	0	0	0	0	0	0	0	0	0	0	0	0	0	0	1	0	0		0		0		0		0		0		0
2012-07-31	97753	*	*	adult	1	*	*	Private	Fecal sample	0	0	0	0	1	0	0	0	0	0	0	0	0	0	0	0	0	0	0	0	0	0	0	0	0	0	1	2		0		0		0		0		0		0
2012-08-04	83395	*	*	*	1	*	*	Private	Fecal sample	1	0	0	0	0	0	0	0	0	0	0	0	0	0	0	0	0	0	0	0	0	0	0	0	0	1	0	0		0		0		0		0		0		0
2012-08-06	14482	*	*	adult	1	*	0.15	Private	Fecal sample	0	0	0	0	1	0	0	0	0	0	0	0	0	0	0	0	0	0	0	0	0	0	0	0	0	0	0	0		0		0		0		0		0		0
2012-08-06	33615	1	1	juvenile	1	15	*	Private	Fecal sample	1	0	0	0	0	0	0	0	0	0	0	0	0	0	0	0	0	0	0	0	0	0	0	0	0	1	0	0		0		0		0		0		0		0
2012-08-08	46459	1	1	adult	1	*	0.14	Private	Fecal sample	1	0	0	0	0	0	0	0	0	0	0	0	0	0	0	0	0	0	0	0	0	0	0	0	0	0	0	0		0		0		0		0	1	2		0
2012-08-09	86529	*	*	juvenile	1	*	*	Private	Fecal sample	1	0	0	0	0	0	0	0	0	0	0	0	0	0	0	0	0	0	0	0	0	0	0	0	0	1	0	0		0		0		0		0		0		0
2012-08-13	30900	*	*	*	1	*	*	Private	Fecal sample	0	0	0	0	1	0	0	0	0	0	0	0	0	0	0	0	0	0	0	0	0	0	0	0	0	1	0	0		0		0		0		0		0		0
2012-08-15	31303	*	*	adult	1	*	*	Private	Fecal sample	0	0	0	0	0	0	0	0	0	0	0	0	0	0	0	0	0	0	0	0	0	0	0	0	1	1	0	0		0		0		0		0		0		0
2012-08-15	85022	1	1	adult	1	45	0.2	Private	Fecal sample	1	0	0	0	0	0	0	0	0	0	0	0	0	0	0	0	0	0	0	0	0	0	0	0	0	0	1	1		0		0	1	1		0		0		0
2012-08-17	56220	1	1	adult	1	35	*	Private	Fecal sample	1	0	0	0	0	0	0	0	0	0	0	0	0	0	0	0	0	0	0	0	0	0	0	0	0	1	0	0		0		0		0		0		0		0
2012-08-22	76149	1	1	adult	1	22	0.4	Private	Fecal sample	0	0	0	0	1	0	0	0	0	0	0	0	0	0	0	0	0	0	0	0	0	0	0	0	0	0	1	1		0		0		0		0		0		0
2012-08-23	28205	*	*	*	1	*	*	Veterinarian	Fecal sample	0	0	0	0	1	0	0	0	0	0	0	0	0	0	0	0	0	0	0	0	0	0	0	0	0	0	1	2		0		0		0		0		0		0
2012-08-27	57555	*	*	juvenile	1	20	*	Private	Fecal sample	0	0	0	0	1	0	0	0	0	0	0	0	0	0	0	0	0	0	0	0	0	0	0	0	0	1	0	0		0		0		0		0		0		0
2012-08-27	78345	*	*	adult	0	*	*	Private	Fecal sample	0	0	0	0	0	0	0	0	0	0	0	0	0	0	0	0	0	0	0	0	0	0	0	0	1	1	0	0		0		0		0		0		0		0
2012-09-05	30827	*	*	juvenile	0	*	0.03	Private	Fecal sample	0	0	0	0	0	0	0	0	0	0	0	0	0	0	0	0	0	0	0	0	0	0	0	0	1	0	0	0		0		0		0		0		0		0
2012-09-05	73563	1	*	adult	1	40	*	Private	Fecal sample	0	0	0	0	1	0	0	0	0	0	0	0	0	0	0	0	0	0	0	0	0	0	0	0	0	1	0	0		0		0		0		0		0		0
2012-09-10	14482	*	*	adult	1	*	*	Veterinarian	Fecal sample	1	0	0	0	0	0	0	0	0	0	0	0	0	0	0	0	0	0	0	0	0	0	0	0	0	0	1	2		0		0		0		0		0		0
2012-09-13	29633	*	1	*	0	*	*	Private	Fecal sample	0	0	0	0	1	0	0	0	0	0	0	0	0	0	0	0	0	0	0	0	0	0	0	0	0	1	0	0		0		0		0		0		0		0
2012-09-19	66780	1	1	adult	1	40	*	Private	Fecal sample	0	0	0	0	1	0	0	0	0	0	0	0	0	0	0	0	0	0	0	0	0	0	0	0	0	1	0	0		0		0		0		0		0		0
2012-09-20	45897	*	*	*	1	*	*	Private	Fecal sample	0	0	0	0	1	0	0	0	0	0	0	0	0	0	0	0	0	0	0	0	0	0	0	0	0	1	0	0		0		0		0		0		0		0
2012-09-20	2957	2	1	adult	1	*	*	Private	Fecal sample	1	0	0	0	0	0	0	0	0	0	0	0	0	0	0	0	0	0	0	0	0	0	0	0	0	0	0	0		0		0		0		0		0		0
2012-09-24	42499	1	1	juvenile	0	12	*	Private	Fecal sample	0	0	0	0	1	0	0	0	0	0	0	0	0	0	0	0	0	0	0	0	0	0	0	0	0	1	0	0		0		0		0		0		0		0
2012-09-25	3044	1	1	adult	1	20	*	Private	Fecal sample	1	0	0	0	0	0	0	0	0	0	0	0	0	0	0	0	0	0	0	0	0	0	0	0	0	1	0	0		0		0		0		0		0		0
2012-09-25	45897	*	*	*	1	*	*	Private	Fecal sample	0	0	0	0	0	0	0	1	0	0	0	0	0	0	0	0	0	0	0	0	0	0	0	0	0	1	0	0		0		0		0		0		0		0
2012-09-25	53879	1	1	juvenile	0	*	*	Private	Fecal sample	1	0	0	0	0	0	0	0	0	0	0	0	0	0	0	0	0	0	0	0	0	0	0	0	0	1	0	0		0		0		0		0		0		0
2012-09-26	28205	*	*	*	1	*	*	Veterinarian	Fecal sample	0	1	0	0	0	0	0	0	0	0	0	0	0	0	0	0	0	0	0	0	0	0	0	0	0	1	0	0		0		0		0		0		0		0
2012-10-10	28205	1	*	*	1	*	*	Veterinarian	Fecal sample	0	0	0	0	1	0	0	0	0	0	0	0	0	0	0	0	0	0	0	0	0	0	0	0	0	0	1	1		0		0		0		0		0		0
2012-10-10	30827	*	*	*	*	*	0.05	Private	Fecal sample	0	0	0	0	1	0	0	0	0	0	0	0	0	0	0	0	0	0	0	0	0	0	0	0	0	1	0	0		0		0		0		0		0		0
2012-10-12	30952	1	*	adult	1	*	0.02	Private	Fecal sample	1	0	0	0	0	0	0	0	0	0	0	0	0	0	0	0	0	0	0	0	0	0	0	0	0	1	0	0		0		0		0		0		0		0
2012-10-12	30519	1	*	adult	0	*	*	Private	Fecal sample	0	0	0	0	0	0	0	0	0	0	0	0	0	0	0	0	0	0	0	0	0	0	0	0	1	0	0	0		0	1	2		0		0		0		0
2012-10-17	45897	1	*	*	1	*	*	Private	Fecal sample	1	0	0	0	0	0	0	0	0	0	0	0	0	0	0	0	0	0	0	0	0	0	0	0	0	1	0	0		0		0		0		0		0		0
2012-10-17	67433	*	*	adult	1	45	0.12	Private	Fecal sample	1	0	0	0	0	0	0	0	0	0	0	0	0	0	0	0	0	0	0	0	0	0	0	0	0	1	0	0		0		0		0		0		0		0
2012-10-29	28205	*	*	*	1	*	*	Veterinarian	Fecal sample	0	0	0	0	0	0	0	0	0	0	0	0	0	0	1	0	0	0	0	0	0	0	0	0	0	1	0	0		0		0		0		0		0		0
2012-10-29	28205	*	*	*	1	*	*	Veterinarian	Fecal sample	0	0	0	0	0	0	0	0	0	0	0	0	0	0	1	0	0	0	0	0	0	0	0	0	0	1	0	0		0		0		0		0		0		0
2012-11-01	64546	*	*	juvenile	1	12	0.006	Private	Fecal sample	1	0	0	0	0	0	0	0	0	0	0	0	0	0	0	0	0	0	0	0	0	0	0	0	0	1	0	0		0		0		0		0		0		0
2012-11-05	30519	*	*	juvenile	1	*	*	Private	Fecal sample	0	0	0	0	1	0	0	0	0	0	0	0	0	0	0	0	0	0	0	0	0	0	0	0	0	0	1	2		0	1	2		0		0		0		0
2012-11-05	15745	1	1	juvenile	1	*	*	Private	Fecal sample	1	0	0	0	0	0	0	0	0	0	0	0	0	0	0	0	0	0	0	0	0	0	0	0	0	1	0	0		0		0		0		0		0		0
2012-11-09	30453	*	*	juvenile	1	*	*	Private	Fecal sample	1	0	0	0	0	0	0	0	0	0	0	0	0	0	0	0	0	0	0	0	0	0	0	0	0	1	0	0		0		0		0		0		0		0
2012-11-12	58840	1	1	juvenile	1	22	*	Private	Fecal sample	0	0	0	0	1	0	0	0	0	0	0	0	0	0	0	0	0	0	0	0	0	0	0	0	0	0	1	1		0		0		0		0		0		0
2012-11-14	29345	*	*	adult	1	*	*	Private	Fecal sample	0	0	0	0	1	0	0	0	0	0	0	0	0	0	0	0	0	0	0	0	0	0	0	0	0	1	0	0		0		0		0		0		0		0
2012-11-16	53879	*	*	adult	*	*	*	Private	Fecal sample	1	0	0	0	0	0	0	0	0	0	0	0	0	0	0	0	0	0	0	0	0	0	0	0	0	1	0	0		0		0		0		0		0		0
2012-11-19	91522	1	1	adult	1	23	*	Private	Fecal sample	1	0	0	0	0	0	0	0	0	0	0	0	0	0	0	0	0	0	0	0	0	0	0	0	0	0	1	3		0		0		0		0		0		0
2012-11-22	67227	1	1	adult	1	17	0.25	Private	Fecal sample	1	0	0	0	0	0	0	0	0	0	0	0	0	0	0	0	0	0	0	0	0	0	0	0	0	1	0	0		0		0		0		0		0		0
2012-11-22	72622	1	1	adult	1	*	*	Private	Fecal sample	1	0	0	0	0	0	0	0	0	0	0	0	0	0	0	0	0	0	0	0	0	0	0	0	0	1	0	0		0		0		0		0		0		0
2012-11-30	63452	1	1	adult	1	20	0.1		Fecal sample	1	0	0	0	0	0	0	0	0	0	0	0	0	0	0	0	0	0	0	0	0	0	0	0	0	1	0	0		0		0		0		0		0		0
2012-12-05	30655	*	*	juvenile	0	*	*	Private	Fecal sample	0	0	0	0	1	0	0	0	0	0	0	0	0	0	0	0	0	0	0	0	0	0	0	0	0	1	0	0		0		0		0		0		0		0
2012-12-07	68723	1	1	adult	1	40	*	Private	Fecal sample	0	0	0	0	1	0	0	0	0	0	0	0	0	0	0	0	0	0	0	0	0	0	0	0	0	1	0	0		0		0		0		0		0		0
2012-12-10	73614	1	1	adult	1	18	0.07	Private	Fecal sample	0	0	0	0	1	0	0	0	0	0	0	0	0	0	0	0	0	0	0	0	0	0	0	0	0	1	0	0		0		0		0		0		0		0
2012-12-11	44625	1	1	adult	1	*	*	Private	Fecal sample	0	0	0	0	1	0	0	0	0	0	0	0	0	0	0	0	0	0	0	0	0	0	0	0	0	0	1	2		0		0		0		0		0		0
2012-12-13	32052	1	1	adult	1	*	0.11	Private	Fecal sample	0	0	0	0	1	0	0	0	0	0	0	0	0	0	0	0	0	0	0	0	0	0	0	0	0	1	0	0		0		0		0		0		0		0
2012-12-17	30519	*	*	adult	0	*	*	Private	Fecal sample	0	0	0	0	0	0	0	0	0	0	0	0	0	0	0	0	0	0	0	0	0	0	0	0	1	0	0	0		0		0		0		0		0		0
2013-01-04	66809	1	1	adult	1	41	0.2	Private	Fecal sample	0	0	0	0	1	0	0	0	0	0	0	0	0	0	0	0	0	0	0	0	0	0	0	0	0	1	0	0		0		0		0		0		0		0
2013-01-07	66763	1	1	adult	1	*	*	Private	Fecal sample	1	0	0	0	0	0	0	0	0	0	0	0	0	0	0	0	0	0	0	0	0	0	0	0	0	1	0	0		0		0		0		0		0		0
2013-01-08	2906	*	*	adult	*	*	*	Private	Fecal sample	0	0	0	0	0	0	0	0	0	0	0	0	0	0	0	0	0	0	0	0	0	0	0	0	1	0	0	0		0		0		0		0		0		0
2013-01-16	30161	1	1	adult	1	*	*	Private	Fecal sample	0	0	0	0	1	0	0	0	0	0	0	0	0	0	0	0	0	0	0	0	0	0	0	0	0	1	0	0		0		0		0		0		0		0
2013-01-17	45897	*	*	*	1	*	0.2	Private	Fecal sample	0	0	0	0	0	0	0	1	0	0	0	0	0	0	0	0	0	0	0	0	0	0	0	0	0	0	0	0		0		0		0		0		0		0
2013-01-21	30926	*	4*	adult	1	*	*	Private	Fecal sample	1	0	0	0	0	0	0	0	0	0	0	0	0	0	0	0	0	0	0	0	0	0	0	0	0	0	0	0		0		0	1	3		0		0		0
2013-01-21	85716	1	1	juvenile	1	15	*	Private	Fecal sample	1	0	0	0	0	0	0	0	0	0	0	0	0	0	0	0	0	0	0	0	0	0	0	0	0	0	0	0		0		0		0		0		0		0
2013-01-21	68309	1	1	adult	0	*	*	Private	Fecal sample	1	0	0	0	0	0	0	0	0	0	0	0	0	0	0	0	0	0	0	0	0	0	0	0	0	0	1	2		0		0	1	1		0		0		0
2013-01-22	45897	*	*	*	1	*	0.14	Private	Fecal sample	1	0	0	0	0	0	0	0	0	0	0	0	0	0	0	0	0	0	0	0	0	0	0	0	0	1	0	0		0		0		0		0		0		0
2013-01-23	96052	1	1	adult	1	40	*	Private	Fecal sample	0	0	0	0	1	0	0	0	0	0	0	0	0	0	0	0	0	0	0	0	0	0	0	0	0	1	0	0		0		0		0		0		0		0
2013-01-23	21079	1	1	juvenile	1	10	*	Private	Fecal sample	0	0	0	0	1	0	0	0	0	0	0	0	0	0	0	0	0	0	0	0	0	0	0	0	0	1	0	0		0		0		0		0		0		0
2013-01-25	10319	*	*	*	*	*	*	Zoo	Fecal sample	1	0	0	0	0	0	0	0	0	0	0	0	0	0	0	0	0	0	0	0	0	0	0	0	0	1	0	0		0		0		0		0		0		0
2013-01-28	3222	*	*	*	*	*	*	Private	Fecal sample	0	0	0	0	1	0	0	0	0	0	0	0	0	0	0	0	0	0	0	0	0	0	0	0	0	1	0	0		0		0		0		0		0		0
2013-01-29	71711	1	1	*	1	20	0.04	Private	Fecal sample	1	0	0	0	0	0	0	0	0	0	0	0	0	0	0	0	0	0	0	0	0	0	0	0	0	1	0	0		0		0		0		0		0		0
2013-01-29	99097	1	1	adult	1	30	0.08	Private	Fecal sample	1	0	0	0	0	0	0	0	0	0	0	0	0	0	0	0	0	0	0	0	0	0	0	0	0	1	0	0		0		0		0		0		0		0
2013-01-30	30419	*	*	adult	1	*	0.08	Private	Fecal sample	0	0	0	0	1	0	0	0	0	0	0	0	0	0	0	0	0	0	0	0	0	0	0	0	0	0	0	0		0		0	1	3		0		0		0
2013-01-30	55797	1	1	adult	1	*	*	Private	Fecal sample	0	0	0	0	1	0	0	0	0	0	0	0	0	0	0	0	0	0	0	0	0	0	0	0	0	0	1	3		0		0	1	3		0		0		0
2013-01-31	53859	*	1	adult	1	*	*	Private	Fecal sample	1	0	0	0	0	0	0	0	0	0	0	0	0	0	0	0	0	0	0	0	0	0	0	0	0	1	0	0		0		0		0		0		0		0
2013-02-04	30519	*	*	adult	1	*	*	Private	Fecal sample	0	0	0	0	1	0	0	0	0	0	0	0	0	0	0	0	0	0	0	0	0	0	0	0	0	1	0	0		0		0		0		0		0		0
2013-02-12	75038	1	1	adult	1	20	*	Private	Fecal sample	0	0	0	0	0	0	0	0	0	0	0	0	0	0	0	0	0	0	0	0	0	0	0	0	1	1	0	0		0		0		0		0		0		0
2013-02-13	31535	2	*	adult	*	*	*	Private	Fecal sample	0	0	0	0	1	0	0	0	0	0	0	0	0	0	0	0	0	0	0	0	0	0	0	0	0	0	1	1		0		0		0		0		0		0
2013-02-18	14482	*	*	adult	1	*	0.17	Private	Fecal sample	0	0	0	0	1	0	0	0	0	0	0	0	0	0	0	0	0	0	0	0	0	0	0	0	0	0	1	2		0		0		0		0		0		0
2013-02-18	45897	*	*	*	*	*	*		Fecal sample	0	0	0	0	1	0	0	0	0	0	0	0	0	0	0	0	0	0	0	0	0	0	0	0	0	1	0	0		0		0		0		0		0		0
2013-02-21	28205	1	*	*	0	*	*	Veterinarian	Fecal sample	0	0	0	0	1	0	0	0	0	0	0	0	0	0	0	0	0	0	0	0	0	0	0	0	0	1	0	0		0		0		0		0		0		0
2013-02-22	71332	1	1	adult	0	30	*	Private	Fecal sample	0	0	0	0	1	0	0	0	0	0	0	0	0	0	0	0	0	0	0	0	0	0	0	0	0	0	1	3		0		0		0		0		0		0
2013-02-26	14482	*	*	juvenile	0	*	*	Private	Fecal sample	1	0	0	0	0	0	0	0	0	0	0	0	0	0	0	0	0	0	0	0	0	0	0	0	0	0	0	0		0		0	1	1		0		0		0
2013-03-04	28205	*	*	*	1	*	*	Veterinarian	Fecal sample	0	0	0	0	1	0	0	0	0	0	0	0	0	0	0	0	0	0	0	0	0	0	0	0	0	1	0	0		0		0		0		0		0		0
2013-03-06	96052	1	1	*	1	40	*	Private	Fecal sample	0	0	0	0	1	0	0	0	0	0	0	0	0	0	0	0	0	0	0	0	0	0	0	0	0	1	0	0		0		0		0		0		0		0
2013-03-07	29633	1	1	*	1	*	*	Private	Fecal sample	0	0	0	0	1	0	0	0	0	0	0	0	0	0	0	0	0	0	0	0	0	0	0	0	0	1	0	0		0		0		0		0		0		0
2013-03-08	46499	1	1	adult	1	*	*	Private	Fecal sample	1	0	0	0	0	0	0	0	0	0	0	0	0	0	0	0	0	0	0	0	0	0	0	0	0	1	0	0		0		0		0		0		0		0
2013-03-08	67256	*	0	adult	1	40	0.16	Private	Fecal sample	1	0	0	0	0	0	0	0	0	0	0	0	0	0	0	0	0	0	0	0	0	0	0	0	0	1	0	0		0		0		0		0		0		0
2013-03-12	67655	1	1	adult	1	25	0.08	Private	Fecal sample	1	0	0	0	0	0	0	0	0	0	0	0	0	0	0	0	0	0	0	0	0	0	0	0	0	1	0	0		0		0		0		0		0		0
2013-03-12	17491	1	*	adult	1	*	0.23	Private	Fecal sample	1	0	0	0	0	0	0	0	0	0	0	0	0	0	0	0	0	0	0	0	0	0	0	0	0	0	0	0		0		0		0		0		0		0
2013-03-14	49692	1	1	adult	0	*	*	Private	Fecal sample	1	0	0	0	0	0	0	0	0	0	0	0	0	0	0	0	0	0	0	0	0	0	0	0	0	1	0	0		0		0		0		0		0		0
2013-03-15	25565	1	1	juvenile	1	10	0.003	Private	Fecal sample	1	0	0	0	0	0	0	0	0	0	0	0	0	0	0	0	0	0	0	0	0	0	0	0	0	1	0	0		0		0		0		0		0		0
2013-03-19	30175	*	1	adult	1	*	*	Private	Fecal sample	0	0	0	0	1	0	0	0	0	0	0	0	0	0	0	0	0	0	0	0	0	0	0	0	0	1	0	0		0		0		0		0		0		0
2013-03-20	86956	1	1	juvenile	1	*	0.01	Private	Fecal sample	0	0	0	0	1	0	0	0	0	0	0	0	0	0	0	0	0	0	0	0	0	0	0	0	0	1	0	0		0		0		0		0		0		0
2013-03-22	30926	*	*	adult	1	*	*	Private	Fecal sample	1	0	0	0	0	0	0	0	0	0	0	0	0	0	0	0	0	0	0	0	0	0	0	0	0	1	0	0		0		0		0		0		0		0
2013-03-25	30539	*	*	adult	1	*	*	Private	Fecal sample	0	0	0	0	1	0	0	0	0	0	0	0	0	0	0	0	0	0	0	0	0	0	0	0	0	0	1	3		0		0		0		0		0		0
2013-03-27	53797	1	1	adult	1	*	*	Private	Fecal sample	0	0	0	0	1	0	0	0	0	0	0	0	0	0	0	0	0	0	0	0	0	0	0	0	0	0	1	3		0		0	1	3		0		0		0
2013-03-28	55278	1	1	adult	1	38	0.15	Private	Fecal sample	1	0	0	0	0	0	0	0	0	0	0	0	0	0	0	0	0	0	0	0	0	0	0	0	0	1	0	0		0		0		0		0		0		0
2013-04-02	76229	1	1	adult	1	30	0.04	Private	Fecal sample	1	0	0	0	0	0	0	0	0	0	0	0	0	0	0	0	0	0	0	0	0	0	0	0	0	1	0	0		0		0		0		0		0		0
2013-04-02	86529	*	*	adult	1	*	*	Private	Fecal sample	1	0	0	0	0	0	0	0	0	0	0	0	0	0	0	0	0	0	0	0	0	0	0	0	0	1	0	0		0		0		0		0		0		0
2013-04-04	7458	1	1	adult	0	20	0.04	Private	Fecal sample	1	0	0	0	0	0	0	0	0	0	0	0	0	0	0	0	0	0	0	0	0	0	0	0	0	0	1	2		0		0		0		0		0		0
2013-04-04	14482	*	*	juvenile	0	*	0.05	Private	Fecal sample	1	0	0	0	0	0	0	0	0	0	0	0	0	0	0	0	0	0	0	0	0	0	0	0	0	0	0	0		0		0	1	2		0		0		0
2013-04-04	53757	1	1	adult	1	18	0.14	Private	Fecal sample	1	0	0	0	0	0	0	0	0	0	0	0	0	0	0	0	0	0	0	0	0	0	0	0	0	1	0	0		0		0		0		0		0		0
2013-04-05	36217	1	1	juvenile	1	25	0.06	Private	Fecal sample	0	0	0	0	1	0	0	0	0	0	0	0	0	0	0	0	0	0	0	0	0	0	0	0	0	1	0	0		0		0		0		0		0		0
2013-04-11	30855	*	*	*	*	*	*	Private	Fecal sample	0	0	0	0	1	0	0	0	0	0	0	0	0	0	0	0	0	0	0	0	0	0	0	0	0	1	0	0		0		0		0		0		0		0
2013-04-11	65205	1	1	*	0	*	0.04	Private	Fecal sample	1	0	0	0	0	0	0	0	0	0	0	0	0	0	0	0	0	0	0	0	0	0	0	0	0	0	0	0		0		0		0		0		0		0
2013-04-11	81379	1	1	adult	1	40	*	Private	Fecal sample	1	0	0	0	0	0	0	0	0	0	0	0	0	0	0	0	0	0	0	0	0	0	0	0	0	1	0	0		0		0		0		0		0		0
2013-04-11	66869	1	1	juvenile	1	15	*	Private	Fecal sample	0	0	0	0	1	0	0	0	0	0	0	0	0	0	0	0	0	0	0	0	0	0	0	0	0	1	0	0		0		0		0		0		0		0
2013-04-16	45897	*	*	adult	1	*	0.19	Private	Fecal sample	0	0	0	0	1	0	0	0	0	0	0	0	0	0	0	0	0	0	0	0	0	0	0	0	0	1	0	0		0		0		0		0		0		0
2013-04-17	64665	1	1	adult	1	52	*	Private	Fecal sample	0	0	0	0	1	0	0	0	0	0	0	0	0	0	0	0	0	0	0	0	0	0	0	0	0	1	0	0		0		0		0		0		0		0
2013-04-19	45897	*	*	*	1	*	*	Private	Fecal sample	1	0	0	0	0	0	0	0	0	0	0	0	0	0	0	0	0	0	0	0	0	0	0	0	0	1	0	0		0		0		0		0		0		0
2013-04-29	56052	1	1	adult	1	50	0.12	Private	Fecal sample	0	0	0	0	1	0	0	0	0	0	0	0	0	0	0	0	0	0	0	0	0	0	0	0	0	1	0	0		0		0		0		0		0		0
2013-05-08	46419	1	1	adult	1	37	0.145	Private	Fecal sample	1	0	0	0	0	0	0	0	0	0	0	0	0	0	0	0	0	0	0	0	0	0	0	0	0	1	0	0		0		0		0		0		0		0
2013-05-08	30559	*	*	juvenile	1	10	*	Private	Fecal sample	1	0	0	0	0	0	0	0	0	0	0	0	0	0	0	0	0	0	0	0	0	0	0	0	0	0	0	0		0		0		0		0	1	1		0
2013-05-14	30539	*	*	adult	1	*	*	Private	Fecal sample	0	0	0	0	1	0	0	0	0	0	0	0	0	0	0	0	0	0	0	0	0	0	0	0	0	0	1	1		0		0		0		0		0		0
2013-05-15	50735	*	*	*	1	*	*	Zoo	Fecal sample	1	0	0	0	0	0	0	0	0	0	0	0	0	0	0	0	0	0	0	0	0	0	0	0	0	1	0	0		0		0		0		0		0		0
2013-05-17	86529	*	*	*	1	*	*	Private	Fecal sample	1	0	0	0	0	0	0	0	0	0	0	0	0	0	0	0	0	0	0	0	0	0	0	0	0	1	0	0		0		0		0		0		0		0
2013-05-24	28876	*	*	adult	1	*	*	Veterinarian	Fecal sample	0	0	0	0	0	0	0	0	0	0	0	0	0	0	0	0	0	0	0	0	0	0	0	0	1	1	0	0		0		0		0		0		0		0
2013-05-29	68309	1	1	adult	1	*	0.12	Private	Fecal sample	1	0	0	0	0	0	0	0	0	0	0	0	0	0	0	0	0	0	0	0	0	0	0	0	0	1	0	0		0		0		0		0		0		0
2013-06-19	50735	*	*	*	*	*	*	Zoo	Fecal sample	1	0	0	0	0	0	0	0	0	0	0	0	0	0	0	0	0	0	0	0	0	0	0	0	0	1	0	0		0		0		0		0		0		0
2013-06-25	52064	1	1	adult	0	25	*	Private	Fecal sample	1	0	0	0	0	0	0	0	0	0	0	0	0	0	0	0	0	0	0	0	0	0	0	0	0	1	0	0		0		0		0		0		0		0
2013-06-25	97422	1	1	juvenile	*	6	*	Private	Fecal sample	0	0	0	0	0	0	0	0	0	0	1	0	0	0	0	0	0	0	0	0	0	0	0	0	0	1	0	0		0		0		0		0		0		0
2013-06-26	30559	1	1	juvenile	1	*	*	Private	Fecal sample	1	0	0	0	0	0	0	0	0	0	0	0	0	0	0	0	0	0	0	0	0	0	0	0	0	0	0	0		0		0		0		0		0		0
2013-06-27	30539	*	*	*	*	*	*	Private	Fecal sample	0	0	0	0	1	0	0	0	0	0	0	0	0	0	0	0	0	0	0	0	0	0	0	0	0	1	0	0		0		0		0		0		0		0
2013-06-28	31855	*	*	adult	1	*	*	Private	Fecal sample	0	0	0	0	1	0	0	0	0	0	0	0	0	0	0	0	0	0	0	0	0	0	0	0	0	1	0	0		0		0		0		0		0		0
2013-06-28	30900	*	*	adult	0	*	*	Private	Fecal sample	0	0	0	0	1	0	0	0	0	0	0	0	0	0	0	0	0	0	0	0	0	0	0	0	0	1	0	0		0		0		0		0		0		0
2013-06-28	21614	*	*	*	*	*	*	Veterinarian	Fecal sample	0	0	0	0	1	0	0	0	0	0	0	0	0	0	0	0	0	0	0	0	0	0	0	0	0	0	1	2		0		0		0		0		0		0
2013-07-02	30519	*	*	adult	1	*	0.16	Private	Fecal sample	0	0	1	0	0	0	0	0	0	0	0	0	0	0	0	0	0	0	0	0	0	0	0	0	0	0	0	0		0		0		0		0		0		0
2013-07-11	55278	1	1	adult	1	40	0.15	Private	Fecal sample	1	0	0	0	0	0	0	0	0	0	0	0	0	0	0	0	0	0	0	0	0	0	0	0	0	0	0	0		0		0	1	1		0		0		0
2013-07-15	71332	1	0	adult	0	26	0.11	Private	Fecal sample	0	0	0	0	1	0	0	0	0	0	0	0	0	0	0	0	0	0	0	0	0	0	0	0	0	0	1	2		0		0		0		0		0		0
2013-07-15	30519	*	*	juvenile	1	*	*	Private	Fecal sample	0	0	0	0	0	0	0	0	0	0	0	0	0	1	0	0	0	0	0	0	0	0	0	0	0	1	0	0		0		0		0		0		0		0
2013-07-16	30559	*	*	juvenile	1	*	*	Private	Fecal sample	1	0	0	0	0	0	0	0	0	0	0	0	0	0	0	0	0	0	0	0	0	0	0	0	0	0	0	0		0		0		0		0		0		0
2013-07-26	30625	*	*	*	0	*	0.09	Private	Fecal sample	0	0	0	0	0	0	0	0	0	0	0	0	0	0	0	0	0	0	0	0	0	0	0	0	1	1	0	0		0		0		0		0		0		0
2013-07-31	30826	*	*	adult	1	*	0.21	Private	Fecal sample	1	0	0	0	0	0	0	0	0	0	0	0	0	0	0	0	0	0	0	0	0	0	0	0	0	1	0	0		0		0		0		0		0		0
2013-08-06	61118	1	0	adult	1	30	0.6	Private	Fecal sample	1	0	0	0	0	0	0	0	0	0	0	0	0	0	0	0	0	0	0	0	0	0	0	0	0	0	1	2		0		0		0		0		0		0
2013-08-06	45897	*	*	*	*	*	*	Private	Fecal sample	0	0	0	0	1	0	0	0	0	0	0	0	0	0	0	0	0	0	0	0	0	0	0	0	0	1	0	0		0		0		0		0		0		0
2013-08-07	32108	*	*	adult	*	11	0.008	Private	Fecal sample	0	0	0	0	0	0	0	0	0	0	0	0	0	0	0	0	0	0	0	0	0	0	0	0	1	1	0	0		0		0		0		0		0		0
2013-08-15	14478	*	*	juvenile	0	22	0.03	Private	Fecal sample	1	0	0	0	0	0	0	0	0	0	0	0	0	0	0	0	0	0	0	0	0	0	0	0	0	0	0	0		0		0	1	2		0		0		0
2013-08-21	14478	1	1	juvenile	1	29	0.05	Private	Fecal sample	1	0	0	0	0	0	0	0	0	0	0	0	0	0	0	0	0	0	0	0	0	0	0	0	0	0	0	0		0		0	1	1		0		0		0
2013-09-02	39128	1	1	adult	1	38	0.19	Private	Fecal sample	1	0	0	0	0	0	0	0	0	0	0	0	0	0	0	0	0	0	0	0	0	0	0	0	0	1	0	0		0		0		0		0		0		0
2013-09-04	30519	1	1	*	1	20	*	Private	Fecal sample	0	0	0	0	1	0	0	0	0	0	0	0	0	0	0	0	0	0	0	0	0	0	0	0	0	1	0	0		0		0		0		0		0		0
2013-09-04	67433	*	*	adult	1	45	0.13	Private	Fecal sample	1	0	0	0	0	0	0	0	0	0	0	0	0	0	0	0	0	0	0	0	0	0	0	0	0	1	0	0		0		0		0		0		0		0
2013-09-13	2977	*	*	adult	0	*	*	Veterinarian	Fecal sample	0	0	0	0	0	0	1	0	0	0	0	0	0	0	0	0	0	0	0	0	0	0	0	0	0	1	0	0		0		0		0		0		0		0
2013-09-18	4720	1	1	adult	0	20	0.04	Private	Fecal sample	1	0	0	0	0	0	0	0	0	0	0	0	0	0	0	0	0	0	0	0	0	0	0	0	0	1	0	0		0		0		0		0		0		0
2013-09-23	51145	1	1	adult	1	*	*	Private	Fecal sample	0	0	0	0	1	0	0	0	0	0	0	0	0	0	0	0	0	0	0	0	0	0	0	0	0	1	0	0		0		0		0		0		0		0
2013-10-02	79725	1	1	juvenile	1	20	*	Private	Fecal sample	1	0	0	0	0	0	0	0	0	0	0	0	0	0	0	0	0	0	0	0	0	0	0	0	0	1	0	0		0		0		0		0		0		0
2013-10-07	21614	*	*	adult	*	*	*	Private	Fecal sample	0	0	0	0	0	0	0	0	0	0	0	0	0	0	0	0	0	0	0	0	0	0	0	0	1	1	0	0		0		0		0		0		0		0
2013-10-07	14478	1	1	juvenile	1	27	0.04	Private	Fecal sample	1	0	0	0	0	0	0	0	0	0	0	0	0	0	0	0	0	0	0	0	0	0	0	0	0	1	0	0		0		0		0		0		0		0
2013-10-09	58730	*	*	adult	1	*	*	Private	Fecal sample	1	0	0	0	0	0	0	0	0	0	0	0	0	0	0	0	0	0	0	0	0	0	0	0	0	1	0	0		0		0		0		0		0		0
2013-10-14	67655	*	*	adult	1	38	0.14	Private	Fecal sample	1	0	0	0	0	0	0	0	0	0	0	0	0	0	0	0	0	0	0	0	0	0	0	0	0	1	0	0		0		0		0		0		0		0
2013-10-17	67655	*	*	adult	0	*	*	Private	Fecal sample	1	0	0	0	0	0	0	0	0	0	0	0	0	0	0	0	0	0	0	0	0	0	0	0	0	1	0	0		0		0		0		0		0		0
2013-11-04	30451	*	*	adult	1	*	*	Private	Fecal sample	0	0	0	0	1	0	0	0	0	0	0	0	0	0	0	0	0	0	0	0	0	0	0	0	0	1	0	0		0		0		0		0		0		0
2013-11-05	14822	*	*	*	1	*	*	Private	Fecal sample	0	0	0	0	0	0	1	0	0	0	0	0	0	0	0	0	0	0	0	0	0	0	0	0	0	1	0	0		0		0		0		0		0		0
2013-11-05	30519	1	1	adult	1	36	0.16	Private	Fecal sample	0	0	1	0	0	0	0	0	0	0	0	0	0	0	0	0	0	0	0	0	0	0	0	0	0	0	0	0		0		0		0		0		0		0
2013-11-07	7333	*	*	adult	0	*	*	Private	Fecal sample	1	0	0	0	0	0	0	0	0	0	0	0	0	0	0	0	0	0	0	0	0	0	0	0	0	1	0	0		0		0		0		0		0		0
2013-11-15	13353	*	*	juvenile	1	15	*	Private	Fecal sample	0	0	0	0	1	0	0	0	0	0	0	0	0	0	0	0	0	0	0	0	0	0	0	0	0	0	1	2		0		0		0		0		0		0
2013-11-20	2826	*	*	adult	1	*	*	Zoo	Fecal sample	1	0	0	0	0	0	0	0	0	0	0	0	0	0	0	0	0	0	0	0	0	0	0	0	0	1	0	0		0		0		0		0		0		0
2013-11-20	17489	1	1	adult	1	15	*	Private	Fecal sample	0	0	0	0	1	0	0	0	0	0	0	0	0	0	0	0	0	0	0	0	0	0	0	0	0	0	1	2		0		0		0		0		0		0
2013-11-20	99092	1	1	juvenile	1	10	*	Private	Fecal sample	0	0	0	1	0	0	0	0	0	0	0	0	0	0	0	0	0	0	0	0	0	0	0	0	0	1	0	0		0		0		0		0		0		0
2013-11-21	81379	1	*	adult	1	30	*	Private	Fecal sample	1	0	0	0	0	0	0	0	0	0	0	0	0	0	0	0	0	0	0	0	0	0	0	0	0	1	0	0		0		0		0		0		0		0
2013-11-23	91126	1	1	juvenile	0	*	*	Private	Fecal sample	0	0	0	0	0	0	0	0	0	1	0	0	0	0	0	0	0	0	0	0	0	0	0	0	0	1	0	0		0		0		0		0		0		0
2013-11-25	22397	1	1	juvenile	1	17	0.02	Private	Fecal sample	0	0	0	0	1	0	0	0	0	0	0	0	0	0	0	0	0	0	0	0	0	0	0	0	0	1	0	0		0		0		0		0		0		0
2013-11-28	14822	1	1	adult	0	*	*	Private	Fecal sample	1	0	0	0	0	0	0	0	0	0	0	0	0	0	0	0	0	0	0	0	0	0	0	0	0	1	0	0		0		0		0		0		0		0
2013-12-03	26802	1	*	adult	1	10	*	Private	Fecal sample	0	0	0	0	1	0	0	0	0	0	0	0	0	0	0	0	0	0	0	0	0	0	0	0	0	1	0	0		0		0		0		0		0		0
2013-12-04	30419	1	1	adult	1	30	0.12	Private	Fecal sample	1	0	0	0	0	0	0	0	0	0	0	0	0	0	0	0	0	0	0	0	0	0	0	0	0	1	0	0		0		0		0		0		0		0
2013-12-05	30559	1	*	adult	1	*	*	Private	Fecal sample	0	0	1	0	0	0	0	0	0	0	0	0	0	0	0	0	0	0	0	0	0	0	0	0	0	0	0	0		0		0		0		0		0		0
2013-12-05	55278	1	1	adult	1	41	0.15	Private	Fecal sample	1	0	0	0	0	0	0	0	0	0	0	0	0	0	0	0	0	0	0	0	0	0	0	0	0	0	0	0		0		0		0		0	1	2		0
2013-12-06	66809	1	1	adult	1	18	0.05	Private	Fecal sample	1	0	0	0	0	0	0	0	0	0	0	0	0	0	0	0	0	0	0	0	0	0	0	0	0	1	0	0		0		0		0		0		0		0
2013-12-11	14478	1	1	adult	1	50	0.15	Private	Fecal sample	0	0	0	0	1	0	0	0	0	0	0	0	0	0	0	0	0	0	0	0	0	0	0	0	0	1	0	0		0		0		0		0		0		0
2013-12-12	13187	1	1	juvenile	1	36	*	Private	Fecal sample	0	0	0	0	1	0	0	0	0	0	0	0	0	0	0	0	0	0	0	0	0	0	0	0	0	0	1	2		0		0		0		0		0		0
2013-12-12	28205	1	*	*	0	*	*	Veterinarian	Fecal sample	0	0	0	0	1	0	0	0	0	0	0	0	0	0	0	0	0	0	0	0	0	0	0	0	0	1	0	0		0		0		0		0		0		0
2013-12-17	99092	1	1	juvenile	1	11	*	Private	Fecal sample	1	0	0	0	0	0	0	0	0	0	0	0	0	0	0	0	0	0	0	0	0	0	0	0	0	1	0	0		0		0		0		0		0		0
2014-01-03	49456	1	1	adult	1	*	*	Private	Fecal sample	1	0	0	0	0	0	0	0	0	0	0	0	0	0	0	0	0	0	0	0	0	0	0	0	0	1	0	0		0		0		0		0		0		0
2014-01-06	93444	1	1	adult	0	12	*	Private	Fecal sample	1	0	0	0	0	0	0	0	0	0	0	0	0	0	0	0	0	0	0	0	0	0	0	0	0	1	0	0		0		0		0		0		0		0
2014-01-08	13353	1	1	juvenile	1	13	*	Private	Fecal sample	0	0	0	0	1	0	0	0	0	0	0	0	0	0	0	0	0	0	0	0	0	0	0	0	0	1	0	0		0		0		0		0		0		0
2014-01-08	53797	1	1	adult	1	*	*	Private	Fecal sample	0	0	0	1	0	0	0	0	0	0	0	0	0	0	0	0	0	0	0	0	0	0	0	0	0	1	0	0		0		0		0		0		0		0
2014-01-09	6406	1	1	juvenile	1	20	0.02	Private	Fecal sample	1	0	0	0	0	0	0	0	0	0	0	0	0	0	0	0	0	0	0	0	0	0	0	0	0	1	0	0		0		0		0		0		0		0
2014-01-14	30171	1	1	*	1	15	0.027	Private	Fecal sample	0	0	0	0	0	0	1	0	0	0	0	0	0	0	0	0	0	0	0	0	0	0	0	0	0	1	0	0		0		0		0		0		0		0
2014-01-14	30171	1	1	*	1	15	0.02	Private	Fecal sample	0	0	0	0	0	0	1	0	0	0	0	0	0	0	0	0	0	0	0	0	0	0	0	0	0	1	0	0		0		0		0		0		0		0
2014-01-15	67112	1	1	*	0	6	0.004	Private	Fecal sample	0	0	0	0	0	0	0	0	0	0	0	0	1	0	0	0	0	0	0	0	0	0	0	0	0	1	0	0		0		0		0		0		0		0
2014-01-15	85283	1	1	juvenile	1	13	0.007	Private	Fecal sample	0	0	0	0	1	0	0	0	0	0	0	0	0	0	0	0	0	0	0	0	0	0	0	0	0	1	0	0		0		0		0		0		0		0
2014-01-16	67112	1	1	adult	1	16	0.009	Private	Fecal sample	0	0	0	0	0	0	0	0	0	0	0	0	1	0	0	0	0	0	0	0	0	0	0	0	0	0	0	0		0		0		0		0		0		0
2014-01-17	68259	1	1	adult	1	48	0.18	Private	Fecal sample	0	0	0	0	1	0	0	0	0	0	0	0	0	0	0	0	0	0	0	0	0	0	0	0	0	1	0	0		0		0		0		0		0		0
2014-01-22	73866	1	1	adult	1	38	0.12	Private	Fecal sample	1	0	0	0	0	0	0	0	0	0	0	0	0	0	0	0	0	0	0	0	0	0	0	0	0	1	0	0		0		0		0		0		0		0
2014-01-23	37534	1	1	adult	0	*	0.06	Private	Fecal sample	0	0	0	0	0	0	1	0	0	0	0	0	0	0	0	0	0	0	0	0	0	0	0	0	0	1	0	0		0		0		0		0		0		0
2014-01-27	45897	*	*	adult	1	*	*	Private	Fecal sample	0	0	0	0	1	0	0	0	0	0	0	0	0	0	0	0	0	0	0	0	0	0	0	0	0	1	0	0		0		0		0		0		0		0
2014-01-27	38459	1	1	*	*	*	*	Private	Fecal sample	0	0	0	0	0	0	0	0	0	0	0	0	0	0	0	1	0	0	0	0	0	0	0	0	0	0	0	0		0		0		0		0		0		0
2014-01-27	68259	1	1	adult	0	*	*	Private	Fecal sample	0	0	0	0	1	0	0	0	0	0	0	0	0	0	0	0	0	0	0	0	0	0	0	0	0	1	0	0		0		0		0		0		0		0
2014-01-30	14624	1	1	juvenile	0	16	0.09	Private	Fecal sample	0	0	0	1	0	0	0	0	0	0	0	0	0	0	0	0	0	0	0	0	0	0	0	0	0	1	0	0		0		0		0		0		0		0
2014-02-03	47533	1	1	adult	1	50	0.13	Private	Fecal sample	1	0	0	0	0	0	0	0	0	0	0	0	0	0	0	0	0	0	0	0	0	0	0	0	0	1	0	0		0		0		0		0		0		0
2014-02-06	53859	1	1	adult	1	60	0.17	Private	Fecal sample	0	0	0	0	1	0	0	0	0	0	0	0	0	0	0	0	0	0	0	0	0	0	0	0	0	1	0	0		0		0		0		0		0		0
2014-02-14	38448	1	1	adult	0	*	*	Private	Fecal sample	0	0	0	0	1	0	0	0	0	0	0	0	0	0	0	0	0	0	0	0	0	0	0	0	0	1	0	0		0		0		0		0		0		0
2014-02-28	74321	*	*	adult	1	*	*	Private	Fecal sample	0	0	0	0	0	0	0	0	0	0	0	0	0	0	0	0	0	0	0	0	0	0	0	0	1	0	1	2		0		0		0		0		0		0
2014-03-02	56170	1	1	adult	1	16	0.1	Private	Fecal sample	1	0	0	0	0	0	0	0	0	0	0	0	0	0	0	0	0	0	0	0	0	0	0	0	0	1	0	0		0		0		0		0		0		0
2014-03-04	28205	*	*	*	1	*	*	Veterinarian	Fecal sample	0	0	0	0	1	0	0	0	0	0	0	0	0	0	0	0	0	0	0	0	0	0	0	0	0	1	0	0		0		0		0		0		0		0
2014-03-10	63755	*	*	*	0	*	0.09	Veterinarian	Fecal sample	0	0	0	0	1	0	0	0	0	0	0	0	0	0	0	0	0	0	0	0	0	0	0	0	0	0	1	2		0		0	1	3		0		0		0
2014-03-11	28205	*	*	*	0	*	*	Veterinarian	Fecal sample	0	0	0	0	1	0	0	0	0	0	0	0	0	0	0	0	0	0	0	0	0	0	0	0	0	1	0	0		0		0		0		0		0		0
2014-03-11	63071	1	1	adult	1	35	*	Private	Fecal sample	0	0	0	0	1	0	0	0	0	0	0	0	0	0	0	0	0	0	0	0	0	0	0	0	0	0	1	2		0		0		0		0		0		0
2014-03-12	68259	*	*	juvenile	1	15	*	Private	Fecal sample	1	0	0	0	0	0	0	0	0	0	0	0	0	0	0	0	0	0	0	0	0	0	0	0	0	1	0	0		0		0		0		0		0		0
2014-04-07	38527	1	1	adult	1	30	*	Private	Fecal sample	1	0	0	0	0	0	0	0	0	0	0	0	0	0	0	0	0	0	0	0	0	0	0	0	0	1	0	0		0		0		0		0		0		0
2014-04-08	95158	1	1	adult	0	35	0.1	Private	Fecal sample	0	0	0	0	1	0	0	0	0	0	0	0	0	0	0	0	0	0	0	0	0	0	0	0	0	0	1	2		0		0		0		0		0		0
2014-04-22	41541	1	1	adult	1	*	*	Private	Fecal sample	1	0	0	0	0	0	0	0	0	0	0	0	0	0	0	0	0	0	0	0	0	0	0	0	0	1	0	0		0		0		0		0		0		0
2014-04-30	42499	1	1	adult	0	32	*	Private	Fecal sample	0	0	0	0	1	0	0	0	0	0	0	0	0	0	0	0	0	0	0	0	0	0	0	0	0	0	1	2		0		0		0		0		0		0
2014-05-12	50937	1	1	adult	1	15	0.01	Private	Fecal sample	0	0	0	0	1	0	0	0	0	0	0	0	0	0	0	0	0	0	0	0	0	0	0	0	0	1	0	0		0		0		0		0		0		0
2014-05-13	50735	*	*	*	0	38	0.03	Zoo	Fecal sample	0	0	0	0	1	0	0	0	0	0	0	0	0	0	0	0	0	0	0	0	0	0	0	0	0	0	1	3		0		0		0		0		0		0
2014-05-19	95326	*	*	adult	1	*	0.19	Private	Fecal sample	1	0	0	0	0	0	0	0	0	0	0	0	0	0	0	0	0	0	0	0	0	0	0	0	0	1	0	0		0		0		0		0		0		0
2014-05-22	45896	*	*	adult	1	*	*	Private	Fecal sample	1	0	0	0	0	0	0	0	0	0	0	0	0	0	0	0	0	0	0	0	0	0	0	0	0	1	0	0		0		0		0		0		0		0
2014-05-28	14624	*	*	juvenile	1	20	*	Private	Fecal sample	1	0	0	0	0	0	0	0	0	0	0	0	0	0	0	0	0	0	0	0	0	0	0	0	0	1	0	0		0		0		0		0		0		0
2014-05-28	30451	1	1	juvenile	1	8	*	Private	Fecal sample	0	0	0	0	1	0	0	0	0	0	0	0	0	0	0	0	0	0	0	0	0	0	0	0	0	1	0	0		0		0		0		0		0		0
2014-05-30	34246	1	1	juvenile	1	25	*	Private	Fecal sample	1	0	0	0	0	0	0	0	0	0	0	0	0	0	0	0	0	0	0	0	0	0	0	0	0	1	0	0		0		0		0		0		0		0
2014-06-04	45896	*	*	adult	1	*	*	Private	Fecal sample	0	0	0	0	1	0	0	0	0	0	0	0	0	0	0	0	0	0	0	0	0	0	0	0	0	1	0	0		0		0		0		0		0		0
2014-06-04	63071	1	1	adult	1	*	*	Private	Fecal sample	0	0	0	0	1	0	0	0	0	0	0	0	0	0	0	0	0	0	0	0	0	0	0	0	0	1	0	0		0		0		0		0		0		0
2014-06-10	13595	1	1	juvenile	1	10	*	Private	Fecal sample	0	0	0	0	0	0	0	0	0	0	0	0	0	0	0	0	0	1	0	0	0	0	0	0	0	1	0	0		0		0		0		0		0		0
2014-07-07	22307	1	1	adult	1	28	0.09	Private	Fecal sample	0	0	0	0	1	0	0	0	0	0	0	0	0	0	0	0	0	0	0	0	0	0	0	0	0	0	1	3		0		0		0		0		0		0
2014-07-09	68259	1	1	adult	1	15	*	Private	Fecal sample	1	0	0	0	0	0	0	0	0	0	0	0	0	0	0	0	0	0	0	0	0	0	0	0	0	0	0	0		0		0		0		0	1	2		0
2014-07-15	71229	1	1	adult	1	40	*	Private	Fecal sample	1	0	0	0	0	0	0	0	0	0	0	0	0	0	0	0	0	0	0	0	0	0	0	0	0	1	0	0		0		0		0		0		0		0
2014-07-15	45896	*	*	adult	1	*	*	Private	Fecal sample	1	0	0	0	0	0	0	0	0	0	0	0	0	0	0	0	0	0	0	0	0	0	0	0	0	1	0	0		0		0		0		0		0		0
2014-07-15	76829	*	*	*	*	*	*	Private	Fecal sample	1	0	0	0	0	0	0	0	0	0	0	0	0	0	0	0	0	0	0	0	0	0	0	0	0	1	0	0		0		0		0		0		0		0
2014-07-21	50389	2	*	adult	1.1	30	*	Private	Fecal sample	1	0	0	0	0	0	0	0	0	0	0	0	0	0	0	0	0	0	0	0	0	0	0	0	0	1	0	0		0		0		0		0		0		0
2014-07-23	72585	1	1	adult	1	20	0.14	Private	Fecal sample	1	0	0	0	0	0	0	0	0	0	0	0	0	0	0	0	0	0	0	0	0	0	0	0	0	1	0	0		0		0		0		0		0		0
2014-08-07	68259	1	1	adult	1	15	0.09	Private	Fecal sample	1	0	0	0	0	0	0	0	0	0	0	0	0	0	0	0	0	0	0	0	0	0	0	0	0	1	0	0		0		0		0		0		0		0
2014-08-08	50823	1	1	juvenile	1	34	*	Private	Fecal sample	1	0	0	0	0	0	0	0	0	0	0	0	0	0	0	0	0	0	0	0	0	0	0	0	0	1	0	0		0		0		0		0		0		0
2014-08-11	22397	1	1	adult	1	20	*	Private	Fecal sample	0	0	0	0	1	0	0	0	0	0	0	0	0	0	0	0	0	0	0	0	0	0	0	0	0	1	0	0		0		0		0		0		0		0
2014-08-12	45896	*	*	juvenile	1	*	*	Private	Fecal sample	1	0	0	0	0	0	0	0	0	0	0	0	0	0	0	0	0	0	0	0	0	0	0	0	0	1	0	0		0		0		0		0		0		0
2014-08-21	21614	*	*	*	*	*	*	Private	Fecal sample	0	0	0	0	0	0	0	0	0	0	0	0	0	0	0	0	0	0	0	0	0	0	0	0	1	1	0	0		0		0		0		0		0		0
2014-08-22	38108	*	*	juvenile	1	20	0.02	Private	Fecal sample	1	0	0	0	0	0	0	0	0	0	0	0	0	0	0	0	0	0	0	0	0	0	0	0	0	0	0	0		0		0		0		0		0		0
2014-08-27	21614	*	*	*	*	*	*	Private	Fecal sample	0	0	0	0	0	0	0	0	0	0	0	0	0	0	0	0	0	0	0	0	0	0	0	0	1	1	0	0		0		0		0		0		0		0
2014-08-29	10489	*	*	*	1	*	*	Private	Fecal sample	1	0	0	0	0	0	0	0	0	0	0	0	0	0	0	0	0	0	0	0	0	0	0	0	0	1	0	0		0		0		0		0		0		0
2014-09-01	2977	*	*	adult	1	*	*	Private	Fecal sample	0	0	0	0	0	0	0	0	0	0	0	0	0	0	0	0	0	0	0	0	0	0	0	0	1	0	0	0		0		0		0		0		0		0
2014-09-11	79100	1	1	adult	1	30	*	Private	Fecal sample	1	0	0	0	0	0	0	0	0	0	0	0	0	0	0	0	0	0	0	0	0	0	0	0	0	1	0	0		0		0		0		0		0		0
2014-09-29	67655	*	*	adult	0	*	0.05	Private	Fecal sample	1	0	0	0	0	0	0	0	0	0	0	0	0	0	0	0	0	0	0	0	0	0	0	0	0	1	0	0		0		0		0		0		0		0
2014-09-29	67655	*	*	adult	1	*	0.13	Private	Fecal sample	1	0	0	0	0	0	0	0	0	0	0	0	0	0	0	0	0	0	0	0	0	0	0	0	0	1	0	0		0		0		0		0		0		0
2014-09-30	99092	1	1	adult	1	18	*	Private	Fecal sample	0	0	0	1	0	0	0	0	0	0	0	0	0	0	0	0	0	0	0	0	0	0	0	0	0	1	0	0		0		0		0		0		0		0
2014-10-02	30519	2	1	juvenile	1.1	10	*	Private	Fecal sample	0	0	0	0	0	0	0	0	0	0	0	0	0	0	0	0	0	0	0	0	1	0	0	0	0	1	0	0		0		0		0		0		0		0
2014-10-06	66564	1	2	adult	1	30	*	Private	Fecal sample	0	0	0	0	1	0	0	0	0	0	0	0	0	0	0	0	0	0	0	0	0	0	0	0	0	1	0	0		0		0		0		0		0		0
2014-10-21	30519	2	*	*	1.1	10	*	Private	Fecal sample	0	0	0	0	0	0	0	0	0	0	0	0	0	0	0	0	0	0	0	0	1	0	0	0	0	1	0	0		0		0		0		0		0		0
2014-11-04	97506	1	1	adult	1	30	0.16	Private	Fecal sample	0	0	0	0	1	0	0	0	0	0	0	0	0	0	0	0	0	0	0	0	0	0	0	0	0	1	0	0		0		0		0		0		0		0
2014-11-10	63452	1	1	adult	0	20	*	Private	Fecal sample	1	0	0	0	0	0	0	0	0	0	0	0	0	0	0	0	0	0	0	0	0	0	0	0	0	1	0	0		0		0		0		0		0		0
2014-11-25	72406	1	1	*	0	30	*	Private	Fecal sample	0	0	0	0	0	0	0	1	0	0	0	0	0	0	0	0	0	0	0	0	0	0	0	0	0	1	0	0		0		0		0		0		0		0
2014-11-25	72406	1	1	*	1	22	*	Private	Fecal sample	0	0	0	0	1	0	0	0	0	0	0	0	0	0	0	0	0	0	0	0	0	0	0	0	0	0	1	2		0		0		0		0		0		0
2014-11-26	72406	1	1	*	1	20	*	Private	Fecal sample	0	0	0	0	1	0	0	0	0	0	0	0	0	0	0	0	0	0	0	0	0	0	0	0	0	0	1	2		0		0		0		0		0		0
2014-11-26	72406	1	1	*	0	20	*	Private	Fecal sample	1	0	0	0	0	0	0	0	0	0	0	0	0	0	0	0	0	0	0	0	0	0	0	0	0	1	0	0		0		0		0		0		0		0
2015-01-23	53844	1	1	juvenile	1	7	0.018	Private	Fecal sample	0	0	0	0	1	0	0	0	0	0	0	0	0	0	0	0	0	0	0	0	0	0	0	0	0	0	1	2		0		0		0		0		0		0
2015-03-09	22307	1	1	adult	1	19	0.16	Private	Fecal sample	0	0	0	0	1	0	0	0	0	0	0	0	0	0	0	0	0	0	0	0	0	0	0	0	0	0	0	0		0		0		0		0		0		0
2015-03-30	71229	1	1	adult	1	*	*	Private	Fecal sample	1	0	0	0	0	0	0	0	0	0	0	0	0	0	0	0	0	0	0	0	0	0	0	0	0	1	0	0		0		0		0		0		0		0
2015-04-08	59556	*	*	adult	1	*	*	Private	Fecal sample	1	0	0	0	0	0	0	0	0	0	0	0	0	0	0	0	0	0	0	0	0	0	0	0	0	1	0	0		0		0		0		0		0		0
2015-04-10	86438	1	*	*	1	45	*	Private	Fecal sample	1	0	0	0	0	0	0	0	0	0	0	0	0	0	0	0	0	0	0	0	0	0	0	0	0	1	0	0		0		0		0		0		0		0
2015-04-10	28205	*	*	*	1	*	*	Veterinarian	Fecal sample	1	0	0	0	0	0	0	0	0	0	0	0	0	0	0	0	0	0	0	0	0	0	0	0	0	1	0	0		0		0		0		0		0		0
2015-04-13	45896	*	*	adult	1	*	*	Private	Fecal sample	0	0	0	0	1	0	0	0	0	0	0	0	0	0	0	0	0	0	0	0	0	0	0	0	0	1	0	0		0		0		0		0		0		0
2015-04-14	32584	*	*	juvenile	0	15	0.02	Private	Fecal sample	1	0	0	0	0	0	0	0	0	0	0	0	0	0	0	0	0	0	0	0	0	0	0	0	0	1	0	0		0		0		0		0		0		0
2015-04-14	30559	*	*	adult	1	*	*	Private	Fecal sample	1	0	0	0	0	0	0	0	0	0	0	0	0	0	0	0	0	0	0	0	0	0	0	0	0	1	0	0		0		0		0		0		0		0
2015-04-24	45896	1	*	adult	1	*	*	Private	Fecal sample	0	0	0	0	1	0	0	0	0	0	0	0	0	0	0	0	0	0	0	0	0	0	0	0	0	1	0	0		0		0		0		0		0		0
2015-05-04	78554	1	1	adult	1	25	0.074	Private	Fecal sample	1	0	0	0	0	0	0	0	0	0	0	0	0	0	0	0	0	0	0	0	0	0	0	0	0	0	0	0		0		0		0		0		0		0
2015-05-12	68259	1	1	adult	1	35	0.15	Private	Fecal sample	1	0	0	0	0	0	0	0	0	0	0	0	0	0	0	0	0	0	0	0	0	0	0	0	0	1	0	0		0		0		0		0		0		0
2015-05-12	68259	*	*	adult	1	35	0.13	Private	Fecal sample	1	0	0	0	0	0	0	0	0	0	0	0	0	0	0	0	0	0	0	0	0	0	0	0	0	1	0	0		0		0		0		0		0		0
2015-06-08	30519	*	*	adult	1	*	*	Private	Fecal sample	1	0	0	0	0	0	0	0	0	0	0	0	0	0	0	0	0	0	0	0	0	0	0	0	0	1	0	0		0		0		0		0		0		0
2015-06-08	45896	*	*	adult	1	*	*	Private	Fecal sample	0	0	0	0	1	0	0	0	0	0	0	0	0	0	0	0	0	0	0	0	0	0	0	0	0	1	0	0		0		0		0		0		0		0
2015-06-09	12683	1	1	adult	0	*	0.13	Private	Fecal sample	0	0	0	0	1	0	0	0	0	0	0	0	0	0	0	0	0	0	0	0	0	0	0	0	0	0	0	0		0		0		0		0		0		0
2015-06-19	83435	1	1	juvenile	1	20	*	Private	Fecal sample	1	0	0	0	0	0	0	0	0	0	0	0	0	0	0	0	0	0	0	0	0	0	0	0	0	0	0	0		0		0		0		0		0		0
2015-06-29	30519	*	*	*	1	15	0.01	Private	Fecal sample	0	0	0	0	0	0	0	0	0	0	0	0	0	0	0	0	0	0	0	0	0	1	0	0	0	1	0	0		0		0		0		0		0		0
2015-09-08	85048	1	1	adult	1	*	*	Private	Fecal sample	1	0	0	0	0	0	0	0	0	0	0	0	0	0	0	0	0	0	0	0	0	0	0	0	0	0	0	0		0		0		0		0		0	1	2
2015-09-08	66450	1	1	adult	1	45	0.17	Private	Fecal sample	0	0	0	0	1	0	0	0	0	0	0	0	0	0	0	0	0	0	0	0	0	0	0	0	0	1	0	0		0		0		0		0		0		0
2015-10-30	51515	1	1	juvenile	1	26	*	Private	Fecal sample	0	0	0	0	1	0	0	0	0	0	0	0	0	0	0	0	0	0	0	0	0	0	0	0	0	1	0	0		0		0		0		0		0		0
2015-11-10	53844	1	1	juvenile	1	*	0.008	Private	Fecal sample	1	0	0	0	0	0	0	0	0	0	0	0	0	0	0	0	0	0	0	0	0	0	0	0	0	1	0	0		0		0		0		0		0		0
2015-11-12	72406	1	1	*	*	*	*	Private	Fecal sample	0	0	0	0	0	0	0	1	0	0	0	0	0	0	0	0	0	0	0	0	0	0	0	0	0	1	0	0		0		0		0		0		0		0
2015-11-12	72406	1	*	adult	1	*	*	Private	Fecal sample	0	0	0	0	0	0	0	0	0	0	0	0	0	0	0	0	0	0	0	0	0	0	0	0	1	1	0	0		0		0		0		0		0		0
2015-11-12	72406	1	1	adult	2	20	*	Private	Fecal sample	0	0	0	0	0	0	0	0	0	0	0	0	0	0	0	0	0	0	0	0	0	0	0	0	1	1	0	0		0		0		0		0		0		0
2015-11-24	4838	1	1	juvenile	0	9	0.02	Private	Fecal sample	1	0	0	0	0	0	0	0	0	0	0	0	0	0	0	0	0	0	0	0	0	0	0	0	0	1	0	0		0		0		0		0		0		0
2015-11-27	66922	1	1	adult	2	35	*	Private	Fecal sample	0	0	0	0	0	0	0	0	0	0	0	0	0	0	0	0	0	0	0	0	0	0	0	0	1	0	1	2		0		0		0		0		0		0
2015-12-08	45896	*	*	adult	*	*	*	Private	Fecal sample	0	0	0	0	1	0	0	0	0	0	0	0	0	0	0	0	0	0	0	0	0	0	0	0	0	1	0	0		0		0		0		0		0		0
2015-12-08	45896	*	*	adult	*	*	*	Private	Fecal sample	0	0	0	0	0	0	0	0	0	0	0	0	0	0	0	0	0	0	0	0	0	0	0	0	1	0	0	0		0		0		0		0		0		0
2015-12-09	65510	1	1	adult	1	35	0.22	Private	Fecal sample	0	0	0	0	0	0	0	0	0	0	0	0	0	0	0	0	0	0	0	0	0	0	0	0	1	1	0	0		0		0		0		0		0		0
2015-12-09	31061	1	1	adult	1	30	0.16	Private	Fecal sample	0	0	0	0	1	0	0	0	0	0	0	0	0	0	0	0	0	0	0	0	0	0	0	0	0	1	0	0		0		0		0		0		0		0
2015-12-09	45896	*	*	adult	1	*	*	Private	Fecal sample	0	0	0	0	1	0	0	0	0	0	0	0	0	0	0	0	0	0	0	0	0	0	0	0	0	1	0	0		0		0		0		0		0		0
2015-12-09	45896	*	*	adult	1	*	*	Private	Fecal sample	0	0	0	0	1	0	0	0	0	0	0	0	0	0	0	0	0	0	0	0	0	0	0	0	0	0	0	0		0		0		0		0		0		0
2015-12-18	50735	*	*	*	*	*	*	Zoo	Fecal sample	0	0	0	0	0	0	0	0	0	0	1	0	0	0	0	0	0	0	0	0	0	0	0	0	0	0	0	0		0		0		0		0		0		0
2015-12-18	50735	*	*	*	*	*	*	Zoo	Fecal sample	0	0	0	0	0	0	0	0	0	0	1	0	0	0	0	0	0	0	0	0	0	0	0	0	0	0	0	0		0		0		0		0		0		0
2015-12-18	50735	*	*	*	*	*	*	Zoo	Fecal sample	0	0	0	0	0	0	0	0	0	0	1	0	0	0	0	0	0	0	0	0	0	0	0	0	0	1	0	0		0		0		0		0		0		0
2015-12-18	50735	*	*	*	*	*	*	Zoo	Fecal sample	0	0	0	0	0	0	0	0	0	0	1	0	0	0	0	0	0	0	0	0	0	0	0	0	0	0	0	0		0		0		0		0		0		0
2015-12-18	50735	*	*	*	*	*	*	Zoo	Fecal sample	0	0	0	0	0	0	0	0	0	0	1	0	0	0	0	0	0	0	0	0	0	0	0	0	0	0	0	0		0		0		0		0		0		0
2015-12-18	50735	*	*	*	*	*	*	Zoo	Fecal sample	0	0	0	0	0	0	0	0	0	0	1	0	0	0	0	0	0	0	0	0	0	0	0	0	0	1	0	0		0		0		0		0		0		0
2015-12-18	50735	*	*	*	*	*	*	Zoo	Fecal sample	0	0	0	0	0	0	0	0	0	0	1	0	0	0	0	0	0	0	0	0	0	0	0	0	0	0	0	0		0		0		0		0		0		0
2015-12-18	50735	*	*	*	*	*	*	Zoo	Fecal sample	0	0	0	0	0	0	0	0	0	0	1	0	0	0	0	0	0	0	0	0	0	0	0	0	0	0	0	0		0		0		0		0		0		0
2015-12-30	30419	*	*	adult	1	18	*	Zoo	Fecal sample	1	0	0	0	0	0	0	0	0	0	0	0	0	0	0	0	0	0	0	0	0	0	0	0	0	0	1	2		0		0		0		0		0		0
2015-12-31	30419	*	*	juvenile	1	18	*	Zoo	Fecal sample	0	0	0	0	0	0	0	0	0	0	0	0	0	0	0	0	0	0	0	0	0	0	0	0	1	0	1	2		0		0		0		0		0		0
2015-12-31	30419	1	1	adult	1	18	*	Zoo	Fecal sample	0	0	0	0	1	0	0	0	0	0	0	0	0	0	0	0	0	0	0	0	0	0	0	0	0	0	1	2		0		0		0		0		0		0
2015-12-31	30419	*	*	juvenile	1	18	*	Zoo	Fecal sample	0	0	0	0	0	0	0	0	0	0	0	0	0	0	0	0	0	0	0	0	0	0	0	0	1	0	1	2		0		0		0		0		0		0
2016-01-04	50735	*	*	*	2	*	*	Zoo	Fecal sample	0	0	0	0	0	0	0	0	0	0	1	0	0	0	0	0	0	0	0	0	0	0	0	0	0	1	0	0		0		0		0		0		0		0
2016-01-04	50735	*	*	*	0	*	*	Zoo	Fecal sample	0	0	0	0	0	0	0	0	0	0	1	0	0	0	0	0	0	0	0	0	0	0	0	0	0	1	0	0		0		0		0		0		0		0
2016-01-07	50735	*	*	*	2	*	*	Zoo	Fecal sample	0	0	0	0	0	0	0	0	0	0	1	0	0	0	0	0	0	0	0	0	0	0	0	0	0	0	0	0		0		0		0		0		0		0
2016-01-07	50735	*	*	*	2	*	*	Zoo	Fecal sample	0	0	0	0	0	0	0	0	0	0	1	0	0	0	0	0	0	0	0	0	0	0	0	0	0	0	0	0		0		0		0		0		0		0
2016-01-11	41061	1	1	adult	2	22	0.061	Private	Fecal sample	0	0	0	0	0	0	0	0	0	0	0	0	0	0	0	0	0	0	0	0	0	0	0	0	1	1	0	0		0		0		0		0		0		0
2016-01-12	31228	2	1	adult	2	7.3	0.016	Private	Fecal sample	0	0	0	0	0	0	0	0	1	0	0	0	0	0	0	0	0	0	0	0	0	0	0	0	0	1	0	0		0		0		0		0		0		0
2016-01-15	12051	*	*	*	*	*	*	Private	Fecal sample	0	0	0	0	0	0	0	0	0	0	0	0	0	0	0	1	0	0	0	0	0	0	0	0	0	0	0	0		0		0		0		0		0		0
2016-01-15	52134	1	1	adult	1	*	*	Private	Fecal sample	0	0	0	0	1	0	0	0	0	0	0	0	0	0	0	0	0	0	0	0	0	0	0	0	0	0	1	2		0		0		0		0		0		0
2016-01-15	12051	*	*	adult	1	*	*	Private	Fecal sample	0	0	0	0	0	0	0	0	0	0	0	0	0	0	0	0	0	0	0	0	0	0	0	1	0	0	0	0		0		0		0		0		0		0
2016-01-18	4838	2	1	juvenile	2	12	0.018	Private	Fecal sample	0	0	0	0	0	0	0	0	0	0	0	0	0	0	0	0	0	0	0	0	0	0	0	0	1	0	0	0		0		0		0		0		0		0
2016-01-18	4838	*	*	juvenile	1	*	*	Private	Fecal sample	1	0	0	0	0	0	0	0	0	0	0	0	0	0	0	0	0	0	0	0	0	0	0	0	0	0	0	0		0		0		0		0		0		0
2016-01-19	12051	*	*	*	1	*	*	Private	Fecal sample	0	0	0	0	0	0	0	0	0	0	0	0	0	0	0	1	0	0	0	0	0	0	0	0	0	1	0	0		0		0		0		0		0		0
2016-01-21	30519	1	1	juvenile	2	*	*	Private	Fecal sample	0	0	0	0	0	0	0	0	0	0	0	0	0	0	0	0	0	0	0	0	0	1	0	0	0	1	0	0		0		0		0		0		0		0
2016-02-01	28205	*	*	*	1	*	*	Veterinarian	Fecal sample	0	0	0	0	1	0	0	0	0	0	0	0	0	0	0	0	0	0	0	0	0	0	0	0	0	0	1	2		0		0		0		0	1	1		0
2016-02-01	28205	*	*	adult	1	*	*	Veterinarian	Fecal sample	0	0	0	0	1	0	0	0	0	0	0	0	0	0	0	0	0	0	0	0	0	0	0	0	0	0	1	2		0		0		0		0	1	1		0
2016-02-03	86507	*	*	adult	1	19	0.184	Private	Fecal sample	0	0	0	0	0	0	0	0	0	0	0	0	0	0	0	0	0	0	0	0	0	0	0	0	0	1	0	0		0		0		0		0		0		0
2016-02-05	76829	*	*	*	1	*	*	Zoo	Fecal sample	0	0	0	0	1	0	0	0	0	0	0	0	0	0	0	0	0	0	0	0	0	0	0	0	0	1	0	0		0		0		0		0		0		0
2016-02-05	76829	*	*	*	*	*	*	Zoo	Fecal sample	0	0	0	0	1	0	0	0	0	0	0	0	0	0	0	0	0	0	0	0	0	0	0	0	0	1	0	0		0		0		0		0		0		0
2016-02-05	76829	*	*	*	*	*	*	Zoo	Fecal sample	0	0	0	0	1	0	0	0	0	0	0	0	0	0	0	0	0	0	0	0	0	0	0	0	0	1	0	0		0		0		0		0		0		0
2016-02-05	76829	*	*	*	*	*	*	Zoo	Fecal sample	0	0	0	0	1	0	0	0	0	0	0	0	0	0	0	0	0	0	0	0	0	0	0	0	0	1	0	0		0		0		0		0		0		0
2016-02-05	76829	*	*	*	*	*	*	Zoo	Fecal sample	0	0	0	0	1	0	0	0	0	0	0	0	0	0	0	0	0	0	0	0	0	0	0	0	0	1	0	0		0		0		0		0		0		0
2016-02-05	76829	*	*	*	*	*	*	Zoo	Fecal sample	0	0	0	0	1	0	0	0	0	0	0	0	0	0	0	0	0	0	0	0	0	0	0	0	0	1	0	0		0		0		0		0		0		0
2016-02-08	45896	*	*	adult	1	*	*	Private	Fecal sample	0	0	0	0	1	0	0	0	0	0	0	0	0	0	0	0	0	0	0	0	0	0	0	0	0	1	0	0		0		0		0		0		0		0
2016-02-08	45896	*	*	adult	1	*	*	Private	Fecal sample	0	0	0	0	1	0	0	0	0	0	0	0	0	0	0	0	0	0	0	0	0	0	0	0	0	1	0	0		0		0		0		0		0		0
2016-02-11	83278	1	1	adult	1	31	0.076	Private	Fecal sample	0	0	0	0	0	0	0	0	0	0	1	0	0	0	0	0	0	0	0	0	0	0	0	0	0	1	0	0		0		0		0		0		0		0
2016-02-12	30419	1	Zoo	adult	1	9	*	Private	Fecal sample	0	0	0	0	0	0	0	0	0	0	0	0	0	0	0	0	0	0	0	0	0	0	0	0	1	1	0	0		0		0		0		0		0		0
2016-02-12	42781	1	1	juvenile	1	30	0.061	Private	Fecal sample	0	0	0	0	0	0	0	0	0	0	0	0	0	0	0	0	0	0	0	0	0	0	0	0	1	0	1	2		0		0		0		0		0		0
2016-02-12	30419	*	*	*	1	9	*	Zoo	Fecal sample	1	0	0	0	0	0	0	0	0	0	0	0	0	0	0	0	0	0	0	0	0	0	0	0	0	1	0	0		0		0		0		0		0		0
2016-02-15	28205	*	*	*	1	*	*	Veterinarian	Fecal sample	0	0	0	0	1	0	0	0	0	0	0	0	0	0	0	0	0	0	0	0	0	0	0	0	0	1	0	0		0		0		0		0		0		0
2016-02-15	28205	*	*	*	1	*	*	Veterinarian	Fecal sample	0	0	0	0	1	0	0	0	0	0	0	0	0	0	0	0	0	0	0	0	0	0	0	0	0	1	0	0		0		0		0		0		0		0
2016-02-23	66125	1	1	juvenile	1	13	*	Private	Fecal sample	0	0	0	0	0	0	0	0	0	0	0	0	0	0	0	0	0	0	0	0	0	0	0	0	1	0	0	0		0		0		0		0		0		0
2016-02-24	66125	1	1	adult	2	11	*	Private	Fecal sample	0	0	0	0	0	0	0	0	0	0	0	0	0	0	0	0	0	0	0	0	0	0	0	0	1	1	0	0		0		0		0		0		0		0
2016-02-25	4838	2	*	juvenile	*	*	*	Private	Fecal sample	0	0	0	0	0	0	0	0	0	0	0	0	0	0	0	0	0	0	0	0	0	0	0	0	1	0	0	0		0		0		0		0		0		0
2016-02-29	85764	*	*	*	*	*	0.062	Private	Fecal sample	0	0	0	0	0	0	0	0	0	0	0	0	0	0	0	1	0	0	0	0	0	0	0	0	0	1	0	0		0		0		0		0		0		0
2016-02-29	53639	*	*	adult	1	*	*	Private	Fecal sample	0	0	0	0	0	0	0	0	0	0	0	0	0	0	0	0	0	0	0	0	0	0	0	0	1	0	0	0		0		0		0		0		0		0
2016-03-01	14612	*	*	adult	1	*	*	Private	Fecal sample	0	0	0	0	0	0	0	0	0	0	0	0	0	0	0	0	0	0	0	0	0	0	0	0	1	1	0	0		0		0		0		0		0		0
2016-03-01	14612	*	*	adult	1	*	*	Private	Fecal sample	0	0	0	0	1	0	0	0	0	0	0	0	0	0	0	0	0	0	0	0	0	0	0	0	0	0	0	0		0		0		0		0		0		0
2016-03-07	29614	1	1	adult	1	17.5	0.117	Private	Fecal sample	0	0	0	0	1	0	0	0	0	0	0	0	0	0	0	0	0	0	0	0	0	0	0	0	0	1	0	0		0		0		0		0		0		0
2016-03-14	95233	*	*	adult	*	*	0.26	Veterinarian	Fecal sample	0	0	0	0	0	0	0	0	0	0	0	0	0	0	0	0	0	0	0	0	0	0	0	0	1	1	0	0		0		0		0		0		0		0
2016-03-14	64439	*	*	juvenile	1	25	*	Private	Fecal sample	0	0	0	0	0	0	0	0	0	0	0	0	0	0	0	0	0	0	0	0	0	0	0	0	1	0	0	0		0		0	1	2		0		0		0
2016-03-15	24143	1	1	adult	1	42	0.212	Private	Fecal sample	0	0	0	0	1	0	0	0	0	0	0	0	0	0	0	0	0	0	0	0	0	0	0	0	0	0	1	2		0		0		0		0		0		0
2016-03-17	31303	*	*	*	1	*	*	Veterinarian	Fecal sample	0	0	0	0	0	0	0	0	0	0	0	0	0	0	0	0	0	0	0	0	0	0	0	0	1	1	0	0		0		0		0		0		0		0
2016-03-17	34396	1	1	adult	1	30	*	Private	Fecal sample	0	0	0	0	0	0	0	0	0	0	0	0	0	0	0	0	0	0	0	0	0	0	0	0	1	1	0	0		0		0		0		0		0		0
2016-03-23	66763	*	*	adult	*	*	0.07	Private	Fecal sample	0	0	0	0	1	0	0	0	0	0	0	0	0	0	0	0	0	0	0	0	0	0	0	0	0	1	0	0		0		0		0		0		0		0
2016-03-24	45896	1	1	adult	1	*	*	Private	Fecal sample	0	0	0	0	1	0	0	0	0	0	0	0	0	0	0	0	0	0	0	0	0	0	0	0	0	1	0	0		0		0		0		0		0		0
2016-03-29	42477	1	1	adult	1	*	*	Private	Fecal sample	0	0	0	0	0	0	0	0	0	0	0	0	0	0	0	0	0	0	0	0	0	0	0	0	1	1	0	0		0		0		0		0		0		0
2016-03-30	28329	*	*	juvenile	1	5	*	Private	Fecal sample	0	0	0	0	1	0	0	0	0	0	0	0	0	0	0	0	0	0	0	0	0	0	0	0	0	1	0	0		0		0		0		0		0		0
2016-04-06	50933	*	*	adult	1	35	0.21	Private	Fecal sample	0	0	0	0	1	0	0	0	0	0	0	0	0	0	0	0	0	0	0	0	0	0	0	0	0	1	0	0		0		0		0		0		0		0
2016-04-06	53879	1	1	adult	2	*	*	Private	Fecal sample	0	0	0	0	0	0	0	0	0	0	0	0	0	0	0	0	0	0	0	0	0	0	0	0	1	1	0	0		0		0		0		0		0		0
2016-04-06	66065	1	1	juvenile	1	*	*	Private	Fecal sample	0	0	0	0	1	0	0	0	0	0	0	0	0	0	0	0	0	0	0	0	0	0	0	0	0	0	0	0		0		0	1	1		0		0		0
2016-04-06	66065	1	1	juvenile	1	*	*	Private	Fecal sample	0	0	0	0	1	0	0	0	0	0	0	0	0	0	0	0	0	0	0	0	0	0	0	0	0	0	0	0		0		0	1	2		0		0		0
2016-04-08	30419	*	Zoo	adult	1	35	*	Zoo	Fecal sample	0	0	0	0	0	0	0	0	0	0	0	0	0	0	0	0	0	0	0	0	0	0	0	0	1	1	0	0		0		0		0		0		0		0
2016-04-12	79219	*	*	adult	*	*	*	Private	Fecal sample	0	0	0	0	0	0	0	0	0	0	0	0	0	0	0	0	0	0	0	0	0	0	0	0	1	0	0	0		0		0		0		0		0		0
2016-04-19	97318	1	1	adult	1	25	0.07	Private	Fecal sample	0	0	0	0	1	0	0	0	0	0	0	0	0	0	0	0	0	0	0	0	0	0	0	0	0	0	1	2		0		0		0		0		0		0
2016-05-02	50996	*	*	adult	2	*	*	Veterinarian	Fecal sample	0	0	0	0	0	0	0	0	0	0	0	0	0	0	0	0	1	0	0	0	0	0	0	0	0	1	0	0		0		0		0		0		0		0
2016-05-03	66763	*	*	*	1	*	0.18	Private	Fecal sample	0	0	0	0	0	0	0	0	0	0	0	0	0	0	0	0	0	0	0	0	0	0	0	0	1	1	0	0		0		0		0		0		0		0
2016-05-23	50996	*	*	*	1	*	*	Veterinarian	Fecal sample	0	0	0	0	0	0	0	0	0	0	0	0	0	0	0	0	0	0	0	0	0	0	0	0	1	1	0	0		0		0		0		0		0		0
2016-05-23	68259	1	1	*	1	35	*	Private	Fecal sample	0	0	0	0	0	0	0	0	0	0	0	0	0	0	0	0	0	0	0	0	0	0	0	0	1	0	1	1		0		0		0		0		0		0
2016-05-24	4838	2	*	adult	2	15	0.039	Private	Fecal sample	0	0	0	0	0	0	0	0	0	0	0	0	0	0	0	0	0	0	0	0	0	0	0	0	1	0	0	0		0		0	1	2		0		0		0
2016-05-25	71679	*	*	*	*	*	*	Private	Fecal sample	0	0	0	0	0	0	0	0	0	0	0	0	0	0	0	0	0	0	0	0	0	0	0	0	1	0	1	2		0		0		0		0		0		0
2016-05-25	16227	*	*	adult	1	*	*	Private	Fecal sample	0	0	0	0	0	0	0	0	0	0	0	0	0	0	0	0	0	0	0	0	0	0	0	0	1	1	0	0		0		0		0		0		0		0
2016-06-01	63452	*	*	*	1	*	*	Veterinarian	Fecal sample	0	0	0	0	0	0	0	0	0	0	0	0	0	0	0	0	0	0	0	0	0	0	0	0	1	1	0	0		0		0		0		0		0		0
2016-06-17	28205	*	*	adult	2	*	*	Veterinarian	Fecal sample	0	0	0	0	0	0	0	0	0	0	0	0	0	0	0	0	0	0	0	0	0	0	0	0	1	0	1	3		0		0		0		0		0		0
2016-07-01	68259	1	1	adult	1	*	*	Private	Fecal sample	0	0	0	0	0	0	0	0	0	0	0	0	0	0	0	0	0	0	0	0	0	0	0	0	1	1	0	0		0		0		0		0		0		0
2016-07-05	45896	*	*	adult	1	*	0.166	Private	Fecal sample	0	0	0	0	1	0	0	0	0	0	0	0	0	0	0	0	0	0	0	0	0	0	0	0	0	1	0	0		0		0		0		0		0		0
2016-07-06	76829	*	*	*	2	*	*	Zoo	Fecal sample	0	0	0	0	1	0	0	0	0	0	0	0	0	0	0	0	0	0	0	0	0	0	0	0	0	1	0	0		0		0		0		0		0		0
2016-07-08	68259	*	*	adult	1	*	*	Private	Fecal sample	0	0	0	0	0	0	0	0	0	0	0	0	0	0	0	0	0	0	0	0	0	0	0	0	1	1	0	0		0		0		0		0		0		0
2016-07-21	40549	1	1	adult	1	15	*	Private	Fecal sample	0	0	0	0	0	0	0	0	0	0	0	0	0	0	0	0	0	0	0	0	0	0	0	0	1	1	0	0		0		0		0		0		0		0
2016-07-26	28205	1	1	adult	2	*	*	Veterinarian	Fecal sample	0	0	0	0	0	0	0	0	0	0	0	0	0	0	0	0	0	0	0	0	0	0	0	0	1	1	0	0		0		0		0		0		0		0
2016-07-26	15379	1	1	adult	1	50	0.35	Private	Fecal sample	0	0	0	0	0	0	0	0	0	0	1	0	0	0	0	0	0	0	0	0	0	0	0	0	0	0	1	1		0		0		0		0		0		0
2016-07-26	85049	1	1	adult	1	*	*	Private	Fecal sample	0	0	0	0	0	0	0	0	0	0	0	0	0	0	0	0	0	0	0	0	0	0	0	0	1	0	0	0		0		0		0		0		0		0
2016-08-02	28205	*	*	*	1	*	*	Veterinarian	Fecal sample	0	0	0	0	0	0	0	0	0	0	0	0	0	0	0	0	0	0	0	0	0	0	0	0	1	0	0	0		0		0		0		0		0		0
2016-08-02	25421	1	1	adult	1	38	0.135	Private	Fecal sample	0	0	0	0	0	0	0	0	0	0	0	0	0	0	0	0	0	0	0	0	0	0	0	0	1	0	0	0		0		0		0		0		0		0
2016-08-05	4838	1	1	adult	1	20	0.08	Private	Fecal sample	0	0	0	0	0	0	0	0	0	0	0	0	0	0	0	0	0	0	0	0	0	0	0	0	1	1	0	0		0		0		0		0		0		0
2016-08-09	31303	1	1	adult	1	*	0.128	Veterinarian	Fecal sample	0	0	0	0	0	0	0	0	0	0	0	0	0	0	0	0	0	0	0	0	0	0	0	0	1	1	0	0		0		0		0		0		0		0
2016-08-09	31303	*	*	*	1	*	0.12	Private	Fecal sample	1	0	0	0	0	0	0	0	0	0	0	0	0	0	0	0	0	0	0	0	0	0	0	0	0	1	0	0		0		0		0		0		0		0
2016-08-11	53844	1	1	adult	1	30	0.111	Veterinarian	Fecal sample	0	0	0	0	1	0	0	0	0	0	0	0	0	0	0	0	0	0	0	0	0	0	0	0	0	1	0	0		0		0		0		0		0		0
2016-08-12	91555	1	*	juvenile	1	*	*	Private	Fecal sample	0	0	0	0	0	0	0	0	0	0	0	0	0	0	0	0	0	0	0	0	0	0	0	0	1	1	0	0		0		0		0		0		0		0
2016-08-12	91555	*	*	juvenile	1	*	*	Private	Fecal sample	1	0	0	0	0	0	0	0	0	0	0	0	0	0	0	0	0	0	0	0	0	0	0	0	0	1	0	0		0		0		0		0		0		0
2016-08-22	68809	1	1	adult	1	*	*	Private	Fecal sample	0	0	0	0	1	0	0	0	0	0	0	0	0	0	0	0	0	0	0	0	0	0	0	0	0	1	0	0		0		0		0		0		0		0
2016-08-23	87084	1	1	adult	2	12	*	Private	Fecal sample	0	0	0	0	0	0	0	0	0	0	0	0	0	0	0	0	0	0	0	0	0	1	0	0	0	0	0	0		0		0		0		0		0		0
2016-08-30	15370	1	1	adult	2	*	*	Private	Fecal sample	0	0	0	0	0	0	0	0	0	0	1	0	0	0	0	0	0	0	0	0	0	0	0	0	0	0	1	1		0		0		0		0		0		0
2016-09-01	25421	1	1	adult	1	40	0.14	Private	Fecal sample	0	0	0	0	0	0	0	0	0	0	0	0	0	0	0	0	0	0	0	0	0	0	0	0	1	1	0	0		0		0		0		0		0		0
2016-09-13	65795	1	1	adult	1	45	0.212	Private	Fecal sample	0	0	0	0	0	0	0	0	0	0	0	0	0	0	0	0	0	0	0	0	0	0	0	0	1	1	0	0		0		0		0		0		0		0
2016-09-15	30855	1	1	juvenile	1	12	*	Private	Fecal sample	0	0	0	0	0	0	0	0	0	0	0	0	0	0	0	0	0	0	0	0	0	0	0	0	1	1	0	0		0		0		0		0		0		0
2016-09-15	28205	*	*	*	2	*	*	Veterinarian	Fecal sample	0	0	0	0	0	0	0	0	0	0	0	1	0	0	0	0	0	0	0	0	0	0	0	0	0	0	1	1		0		0		0		0		0		0
2016-09-15	71155	1	1	adult	1	*	*	Private	Fecal sample	0	0	0	0	0	0	0	0	0	0	0	0	0	0	0	0	0	0	0	0	0	0	0	0	1	0	1	2		0		0		0		0		0		0
2016-09-15	71155	1	1	adult	1	*	*	Private	Fecal sample	1	0	0	0	0	0	0	0	0	0	0	0	0	0	0	0	0	0	0	0	0	0	0	0	0	0	1	2		0		0		0		0		0		0
2016-09-15	30855	1	1	juvenile	1	12	*	Private	Fecal sample	1	0	0	0	0	0	0	0	0	0	0	0	0	0	0	0	0	0	0	0	0	0	0	0	0	1	0	0		0		0		0		0		0		0
2016-09-16	13089	*	*	adult	1	*	*	Private	Fecal sample	0	0	0	0	1	0	0	0	0	0	0	0	0	0	0	0	0	0	0	0	0	0	0	0	0	1	0	0		0		0		0		0		0		0
2016-09-19	87534	2	1	adult	2	*	*	Private	Fecal sample	0	0	0	0	0	0	0	0	0	0	0	0	0	0	0	0	0	0	0	0	0	0	0	0	1	1	0	0		0		0		0		0		0		0
2016-09-19	87534	1	1	juvenile	1	*	*	Private	Fecal sample	0	0	0	0	0	0	0	0	0	0	0	0	0	0	0	0	0	0	0	0	0	0	0	0	1	0	0	0		0		0		0		0		0		0
2016-09-19	87534	*	*	adult	0	*	*	Private	Fecal sample	1	0	0	0	0	0	0	0	0	0	0	0	0	0	0	0	0	0	0	0	0	0	0	0	0	1	0	0		0		0		0		0		0		0
2016-09-20	1728	*	*	*	0	*	*	Veterinarian	Fecal sample	0	0	0	0	0	0	0	0	0	0	0	0	0	0	0	0	0	0	0	0	0	0	0	0	1	1	0	0		0		0		0		0		0		0
2016-09-21	28205	*	*	*	1	*	*	Veterinarian	Fecal sample	0	0	0	0	0	0	0	0	0	0	0	0	0	0	0	0	0	0	0	0	0	0	0	0	1	0	0	0		0		0		0		0		0		0
2016-09-21	1728	*	*	*	2	*	*	Veterinarian	Fecal sample	0	0	0	0	0	0	0	0	0	0	0	0	0	0	0	0	0	0	0	0	0	0	0	0	1	1	0	0		0		0		0		0		0		0
2016-09-21	28205	*	*	*	1	*	*	Veterinarian	Fecal sample	1	0	0	0	0	0	0	0	0	0	0	0	0	0	0	0	0	0	0	0	0	0	0	0	0	0	0	0		0		0		0		0		0		0
2016-09-28	47533	1	1	juvenile	1	*	0.01	Private	Fecal sample	0	0	0	0	0	0	0	0	0	0	0	0	0	0	0	0	0	0	0	0	0	0	0	0	1	1	0	0		0		0		0		0		0		0
2016-10-07	28205	*	*	*	*	*	*	Veterinarian	Fecal sample	0	0	0	0	1	0	0	0	0	0	0	0	0	0	0	0	0	0	0	0	0	0	0	0	0	1	0	0		0		0		0		0		0		0
2016-10-12	83278	1	1	adult	1	51	0.329	Private	Fecal sample	0	0	0	0	0	0	0	0	0	0	1	0	0	0	0	0	0	0	0	0	0	0	0	0	0	1	0	0		0		0		0		0		0		0
2016-10-18	12529	*	1	adult	2	*	*	Private	Fecal sample	0	0	0	0	0	0	0	0	0	0	0	0	0	0	0	0	0	0	0	0	0	0	0	0	1	0	0	0		0		0		0		0		0		0
2016-10-18	12529	*	*	*	0	*	*	Private	Fecal sample	0	0	0	0	0	0	0	0	0	0	0	0	0	0	0	0	0	0	0	0	0	0	0	0	1	0	0	0		0		0		0		0		0		0
2016-10-28	38259	*	*	juvenile	1	*	*	Private	Fecal sample	0	0	0	0	0	0	0	0	0	0	0	0	0	0	0	0	0	0	0	0	0	0	0	0	1	0	0	0		0		0	1	3		0		0		0
2016-10-28	30419	*	Zoo	adult	1	*	*	Zoo	Fecal sample	0	0	0	0	0	0	0	0	0	0	0	0	0	0	0	0	0	0	0	0	0	0	0	0	1	0	1	2		0		0		0		0		0		0
2016-10-28	30419	1	1	adult	1	23	0.06	Zoo	Fecal sample	1	0	0	0	0	0	0	0	0	0	0	0	0	0	0	0	0	0	0	0	0	0	0	0	0	0	1	2		0		0		0		0		0		0
2016-10-31	38259	*	*	juvenile	1	*	*	Private	Fecal sample	1	0	0	0	0	0	0	0	0	0	0	0	0	0	0	0	0	0	0	0	0	0	0	0	0	0	0	0		0		0	1	3		0		0		0
2016-11-07	63846	*	*	juvenile	1	*	*	Private	Fecal sample	0	0	0	0	0	0	0	0	0	0	0	0	0	0	0	0	0	0	0	0	0	0	0	0	1	1	0	0		0		0		0		0		0		0
2016-11-07	63846	*	*	juvenile	1	*	*	Private	Fecal sample	1	0	0	0	0	0	0	0	0	0	0	0	0	0	0	0	0	0	0	0	0	0	0	0	0	1	0	0		0		0		0		0		0		0
2016-11-10	53844	1	1	juvenile	1	*	*	Private	Fecal sample	0	0	0	0	0	0	0	0	0	0	0	0	0	0	0	0	0	0	0	0	0	0	0	0	1	1	0	0		0		0		0		0		0		0
2016-11-14	70794	*	*	adult	1	*	*	Private	Fecal sample	0	0	0	0	0	0	0	0	0	0	0	0	0	0	0	0	0	0	0	0	0	0	0	0	1	1	0	0		0		0		0		0		0		0
2016-11-14	70794	*	*	adult	1	*	*	Private	Fecal sample	0	0	0	0	0	0	0	0	0	0	0	0	0	0	0	0	0	0	0	0	0	0	0	0	1	1	0	0		0		0		0		0		0		0
2016-11-16	12051	*	*	adult	1	*	*	Private	Fecal sample	0	0	0	0	0	0	0	0	0	0	0	0	0	0	0	0	0	0	0	0	0	0	0	1	0	0	0	0		0		0		0		0		0		0
2016-11-17	53859	1	1	adult	2	23	*	Private	Fecal sample	0	0	0	0	0	0	0	0	0	0	0	0	0	0	0	0	0	0	0	0	0	0	0	0	1	1	0	0		0		0		0		0		0		0
2016-11-23	53844	1	1	juvenile	1	7	0.018	Private	Fecal sample	0	0	0	0	1	0	0	0	0	0	0	0	0	0	0	0	0	0	0	0	0	0	0	0	0	0	1	2		0		0		0		0		0		0
2016-11-24	4838	2	1	juvenile	*	*	*	Private	Fecal sample	0	0	0	0	0	0	0	0	0	0	0	0	0	0	0	0	0	0	0	0	0	0	0	0	1	1	0	0		0		0		0		0		0		0
2016-11-24	4838	2	1	juvenile	*	*	*	Private	Fecal sample	0	0	0	0	0	0	0	0	0	0	0	0	0	0	0	0	0	0	0	0	0	0	0	0	1	1	0	0		0		0		0		0		0		0
2016-11-25	88506	*	*	*	1	*	0.171	Private	Fecal sample	0	0	0	0	0	0	0	0	0	0	0	0	0	0	0	0	0	0	0	0	0	0	0	0	1	0	0	0		0		0	1	2		0		0		0
2016-11-30	37627	*	*	*	1	*	*	Veterinarian	Fecal sample	0	0	0	0	0	0	0	0	0	0	0	0	0	0	0	0	0	0	0	0	0	0	0	0	1	0	1	3		0		0		0		0		0		0
2016-11-30	38259	*	*	juvenile	1	*	*	Private	Fecal sample	0	0	0	0	0	0	0	0	0	0	0	0	0	0	0	0	0	0	0	0	0	0	0	0	1	1	0	0		0		0		0		0		0		0
2016-11-30	38259	*	*	juvenile	1	*	*	Private	Fecal sample	1	0	0	0	0	0	0	0	0	0	0	0	0	0	0	0	0	0	0	0	0	0	0	0	0	1	0	0		0		0		0		0		0		0
2016-11-30	37627	*	*	*	1	*	*	Private	Fecal sample	0	0	0	0	0	0	0	0	0	0	0	0	0	0	0	0	0	0	0	0	0	0	0	0	1	0	1	3		0		0		0		0		0		0
2016-12-02	61250	1	1	*	1	20	*	Private	Fecal sample	0	0	0	0	1	0	0	0	0	0	0	0	0	0	0	0	0	0	0	0	0	0	0	0	0	0	0	0		0		0	1	2		0		0		0
2016-12-07	45896	*	*	adult	1	*	*	Private	Fecal sample	0	0	0	0	1	0	0	0	0	0	0	0	0	0	0	0	0	0	0	0	0	0	0	0	0	1	0	0		0		0		0		0		0		0
2016-12-07	61250	*	2	juvenile	1	*	*	Private	Fecal sample	0	0	0	0	1	0	0	0	0	0	0	0	0	0	0	0	0	0	0	0	0	0	0	0	0	0	0	0		0		0	1	1		0		0		0
2016-12-07	45896	*	*	adult	1	*	*	Private	Fecal sample	0	0	0	0	1	0	0	0	0	0	0	0	0	0	0	0	0	0	0	0	0	0	0	0	0	1	0	0		0		0		0		0		0		0
2016-12-09	4838	*	*	adult	*	*	*	Private	Fecal sample	0	0	0	0	0	0	0	0	0	0	0	0	0	0	0	0	0	0	0	0	0	0	0	0	1	1	0	0		0		0		0		0		0		0
2016-12-09	4838	1	*	*	1	17	0.09	Private	Fecal sample	1	0	0	0	0	0	0	0	0	0	0	0	0	0	0	0	0	0	0	0	0	0	0	0	0	1	0	0		0		0		0		0		0		0
2016-12-09	4838	1	*	*	0	13	0.05	Private	Fecal sample	1	0	0	0	0	0	0	0	0	0	0	0	0	0	0	0	0	0	0	0	0	0	0	0	0	1	0	0		0		0		0		0		0		0
2016-12-12	68259	*	*	adult	1	*	*	Private	Fecal sample	0	0	0	0	0	0	0	0	0	0	0	0	0	0	0	0	0	0	0	0	0	0	0	0	1	1	0	0		0		0		0		0		0		0
2016-12-12	68259	1	1	adult	1	35	0.13	Private	Fecal sample	1	0	0	0	0	0	0	0	0	0	0	0	0	0	0	0	0	0	0	0	0	0	0	0	0	1	0	0		0		0		0		0		0		0
2016-12-13	13407	*	*	juvenile	1	*	*	Private	Fecal sample	0	0	0	0	1	0	0	0	0	0	0	0	0	0	0	0	0	0	0	0	0	0	0	0	0	1	0	0		0		0		0		0		0		0
2016-12-13	13407	*	*	juvenile	2	*	*	Private	Fecal sample	0	0	0	0	1	0	0	0	0	0	0	0	0	0	0	0	0	0	0	0	0	0	0	0	0	0	1	2		0		0		0		0		0		0
2016-12-13	13407	*	*	juvenile	2	*	*	Private	Fecal sample	0	0	0	0	1	0	0	0	0	0	0	0	0	0	0	0	0	0	0	0	0	0	0	0	0	0	1	2		0		0		0		0		0		0
2016-12-13	53225	1	1	adult	1	*	*	Private	Fecal sample	0	0	0	0	0	0	0	0	0	0	0	0	0	0	0	0	0	0	0	0	0	0	0	0	1	1	0	0		0		0		0		0		0		0
2016-12-13	53225	1	1	adult	1	35	*	Private	Fecal sample	1	0	0	0	0	0	0	0	0	0	0	0	0	0	0	0	0	0	0	0	0	0	0	0	0	1	0	0		0		0		0		0		0		0
2016-12-13	13407	*	*	juvenile	1	*	*	Private	Fecal sample	0	0	0	0	1	0	0	0	0	0	0	0	0	0	0	0	0	0	0	0	0	0	0	0	0	1	0	0		0		0		0		0		0		0
2016-12-13	13407	*	*	juvenile	0	*	*	Private	Fecal sample	0	0	0	0	1	0	0	0	0	0	0	0	0	0	0	0	0	0	0	0	0	0	0	0	0	0	1	2		0		0		0		0		0		0
2016-12-13	13407	*	*	juvenile	0	*	*	Private	Fecal sample	0	0	0	0	1	0	0	0	0	0	0	0	0	0	0	0	0	0	0	0	0	0	0	0	0	0	1	2		0		0		0		0		0		0
2016-12-16	46569	*	*	juvenile	1	*	*	Private	Fecal sample	0	0	0	0	1	0	0	0	0	0	0	0	0	0	0	0	0	0	0	0	0	0	0	0	0	0	0	0		0	1	3		0		0		0		0
2016-12-16	46414	*	*	adult	1	*	*	Private	Fecal sample	0	0	0	0	1	0	0	0	0	0	0	0	0	0	0	0	0	0	0	0	0	0	0	0	0	0	0	0		0	1	3		0		0		0		0
2016-12-22	12529	1	*	*	2	*	*	Private	Fecal sample	0	0	0	0	0	0	0	0	1	0	0	0	0	0	0	0	0	0	0	0	0	0	0	0	0	1	0	0		0		0		0		0		0		0
2016-12-28	41472	1	1	adult	1	18	*	Private	Fecal sample	0	0	0	0	0	0	0	0	0	0	0	0	0	0	0	0	0	0	0	0	0	0	0	0	0	1	0	0		0		0		0		0		0		0
2017-03-28	76829	*	*	*	*	*	*	Zoo	Fecal sample	1	0	0	0	0	0	0	0	0	0	0	0	0	0	0	0	0	0	0	0	0	0	0	0	0	1	0	0		0		0		0		0		0		0
2017-04-04	28205	*	*	*	1	*	*	Veterinarian	Fecal sample	1	0	0	0	0	0	0	0	0	0	0	0	0	0	0	0	0	0	0	0	0	0	0	0	0	1	0	0		0		0		0		0		0		0
2017-04-07	46446	*	*	adult	1	*	*	Private	Fecal sample	1	0	0	0	0	0	0	0	0	0	0	0	0	0	0	0	0	0	0	0	0	0	0	0	0	0	0	0		0		0	1	2		0		0		0
2017-04-20	46562	*	*	adult	1	*	*	Private	Fecal sample	1	0	0	0	0	0	0	0	0	0	0	0	0	0	0	0	0	0	0	0	0	0	0	0	0	1	0	0		0		0		0		0		0		0
2017-04-27	24837	*	*	adult	1	*	*	Private	Fecal sample	0	0	0	0	0	0	0	0	0	0	0	0	0	0	0	1	0	0	0	0	0	0	0	0	0	1	0	0		0		0		0		0		0		0
2017-04-27	38108	*	*	*	*	*	*	Private	Fecal sample	0	0	0	0	0	0	0	0	0	0	0	0	0	0	0	0	0	0	0	0	0	0	0	0	1	0	1	1		0		0		0		0		0		0
2017-04-28	28205	*	*	*	1	*	*	Veterinarian	Fecal sample	1	0	0	0	0	0	0	0	0	0	0	0	0	0	0	0	0	0	0	0	0	0	0	0	0	1	0	0		0		0		0		0		0		0
2017-05-04	53859	*	*	adult	0	*	*	Private	Fecal sample	1	0	0	0	0	0	0	0	0	0	0	0	0	0	0	0	0	0	0	0	0	0	0	0	0	1	0	0		0		0		0		0		0		0
2017-05-04	56220	*	*	*	1	*	*	Private	Fecal sample	0	0	0	1	0	0	0	0	0	0	0	0	0	0	0	0	0	0	0	0	0	0	0	0	0	0	0	0		0		0	1	2		0		0		0
2017-05-05	64839	*	*	adult	1	*	*	Private	Fecal sample	0	0	0	0	1	0	0	0	0	0	0	0	0	0	0	0	0	0	0	0	0	0	0	0	0	1	0	0		0		0		0		0		0		0
2017-05-19	47918	*	*	adult	0	*	*	Private	Fecal sample	0	0	0	0	0	0	0	0	0	0	1	0	0	0	0	0	0	0	0	0	0	0	0	0	0	1	0	0		0		0		0		0		0		0
2017-05-24	47057	*	*	adult	1	*	*	Private	Fecal sample	0	0	0	0	1	0	0	0	0	0	0	0	0	0	0	0	0	0	0	0	0	0	0	0	0	0	0	0		0		0	1	3		0		0		0
2017-05-26	24884	*	*	juvenile	*	*	*	Private	Fecal sample	1	0	0	0	0	0	0	0	0	0	0	0	0	0	0	0	0	0	0	0	0	0	0	0	0	1	0	0		0		0		0		0		0		0
2017-08-01	76829	*	*	*	1	*	*	Zoo	Fecal sample	1	0	0	0	0	0	0	0	0	0	0	0	0	0	0	0	0	0	0	0	0	0	0	0	0	0	0	0		0		0		0		0		0		0
2017-08-01	28205	*	*	adult	1	*	*	Veterinarian	Fecal sample	0	0	0	0	1	0	0	0	0	0	0	0	0	0	0	0	0	0	0	0	0	0	0	0	0	0	1	2		0		0		0		0		0		0
2017-08-07	68723	*	*	adult	1	*	*	Private	Fecal sample	1	0	0	0	0	0	0	0	0	0	0	0	0	0	0	0	0	0	0	0	0	0	0	0	0	1	0	0		0		0		0		0		0		0
2017-08-11	15745	*	*	adult	1	*	*	Private	Fecal sample	1	0	0	0	0	0	0	0	0	0	0	0	0	0	0	0	0	0	0	0	0	0	0	0	0	1	0	0		0		0		0		0		0		0
2017-08-12	31303	*	*	*	*	*	*	Private	Fecal sample	1	0	0	0	0	0	0	0	0	0	0	0	0	0	0	0	0	0	0	0	0	0	0	0	0	0	1	2		0		0		0		0		0		0
2017-08-16	27753	*	*	adult	1	*	*	Private	Fecal sample	0	0	0	0	1	0	0	0	0	0	1	0	0	0	0	0	0	0	0	0	0	0	0	0	0	1	0	0		0		0		0		0		0		0
2017-08-16	47918	*	*	adult	1	*	*	Private	Fecal sample	0	0	0	0	0	0	0	0	0	0	1	0	0	0	0	0	0	0	0	0	0	0	0	0	0	1	0	0		0		0		0		0		0		0
2017-08-16	39130	1	1	*	1	*	0.004	Private	Fecal sample	1	0	0	0	0	0	0	0	0	0	0	0	0	0	0	0	0	0	0	0	0	0	0	0	0	1	0	0		0		0		0		0		0		0
2017-08-18	89081	*	*	*	1	*	*	Private	Fecal sample	0	0	0	0	0	0	0	0	0	0	0	0	0	0	0	0	0	0	0	0	0	0	0	0	1	1	0	0		0		0		0		0		0		0
2017-09-11	28205	*	*	*	0	*	*	Veterinarian	Fecal sample	1	0	0	0	0	0	0	0	0	0	0	0	0	0	0	0	0	0	0	0	0	0	0	0	0	1	0	0		0		0		0		0		0		0
2017-09-13	28105	*	*	*	*	*	*	Private	Fecal sample	0	0	0	0	1	0	0	0	0	0	0	0	0	0	0	0	0	0	0	0	0	0	0	0	0	0	1	1		0		0		0		0		0		0
2017-09-21	31303	*	*	*	*	*	*	Private	Fecal sample	1	0	0	0	0	0	0	0	0	0	0	0	0	0	0	0	0	0	0	0	0	0	0	0	0	1	0	0		0		0		0		0		0		0
2017-09-22	56220	*	*	*	1	*	*	Private	Fecal sample	1	0	0	0	0	0	0	0	0	0	0	0	0	0	0	0	0	0	0	0	0	0	0	0	0	0	0	0		0		0		0		0		0		0
2017-10-10	38381	*	*	*	0	*	*	Private	Fecal sample	0	0	0	0	1	0	0	0	0	0	0	0	0	0	0	0	0	0	0	0	0	0	0	0	0	0	0	0		0		0	1	3		0		0		0
2017-10-12	49808	*	*	adult	1	*	*	Private	Fecal sample	1	0	0	0	0	0	0	0	0	0	0	0	0	0	0	0	0	0	0	0	0	0	0	0	0	1	0	0		0		0		0		0		0		0
2017-10-12	28205	*	*	*	1	*	*	Veterinarian	Fecal sample	1	0	0	0	0	0	0	0	0	0	0	0	0	0	0	0	0	0	0	0	0	0	0	0	0	1	0	0		0		0		0		0		0		0
2017-10-20	49808	*	*	*	1	*	*	Private	Fecal sample	1	0	0	0	0	0	0	0	0	0	0	0	0	0	0	0	0	0	0	0	0	0	0	0	0	1	0	0		0		0		0		0		0		0
2017-10-26	38381	*	*	adult	1	*	*	Private	Fecal sample	0	0	0	0	1	0	0	0	0	0	0	0	0	0	0	0	0	0	0	0	0	0	0	0	0	0	0	0		0		0	1	3		0		0		0
2017-11-08	56112	*	*	adult	1	*	*	Private	Fecal sample	1	0	0	0	0	0	0	0	0	0	0	0	0	0	0	0	0	0	0	0	0	0	0	0	0	1	0	0		0		0		0		0		0		0
2017-11-10	53177	*	*	juvenile	1	*	*	Private	Fecal sample	1	0	0	0	0	0	0	0	0	0	0	0	0	0	0	0	0	0	0	0	0	0	0	0	0	1	0	0		0		0		0		0		0		0
2017-11-13	49084	1	1	adult	1	18	*	Private	Fecal sample	0	0	0	0	0	0	0	0	0	0	0	0	0	0	0	0	0	0	0	1	0	0	0	0	0	1	0	0		0		0		0		0		0		0
2017-11-20	73525	*	*	juvenile	0	*	*	Private	Fecal sample	0	0	0	1	0	0	0	0	0	0	0	0	0	0	0	0	0	0	0	0	0	0	0	0	0	1	0	0		0		0		0		0		0		0
2017-11-21	24558	1	1	adult	1	50	0.2	Private	Fecal sample	0	0	0	0	1	0	0	0	0	0	0	0	0	0	0	0	0	0	0	0	0	0	0	0	0	1	0	0		0		0		0		0		0		0
2017-11-21	28205	*	*	*	0	*	*	Veterinarian	Fecal sample	0	0	0	0	1	0	0	0	0	0	0	0	0	0	0	0	0	0	0	0	0	0	0	0	0	0	1	1		0		0		0		0		0		0
2017-11-28	76829	*	*	juvenile	0	*	*	Zoo	Fecal sample	0	0	0	0	1	0	0	0	0	0	0	0	0	0	0	0	0	0	0	0	0	0	0	0	0	0	1	2		0		0		0		0		0		0
2017-11-29	5795	1	1	adult	1	35	0.2	Private	Fecal sample	0	0	0	0	0	0	0	0	0	0	0	0	0	0	0	0	0	0	0	0	0	0	0	0	1	1	0	0		0		0		0		0		0		0
2017-11-29	10317	*	*	juvenile	*	*	*	Private	Fecal sample	1	0	0	0	0	0	0	0	0	0	0	0	0	0	0	0	0	0	0	0	0	0	0	0	0	1	0	0		0		0		0		0		0		0
2017-12-07	48527	*	*	juvenile	1	*	*	Private	Fecal sample	0	0	0	0	1	0	0	0	0	0	0	0	0	0	0	0	0	0	0	0	0	0	0	0	0	1	0	0		0		0		0		0		0		0
2017-12-13	31655	1	1	adult	1	*	*	Private	Fecal sample	1	0	0	0	0	0	0	0	0	0	0	0	0	0	0	0	0	0	0	0	0	0	0	0	0	1	0	0		0		0		0		0		0		0
2017-12-14	66333	1	1	adult	1	25	0.04	Private	Fecal sample	1	0	0	0	0	0	0	0	0	0	0	0	0	0	0	0	0	0	0	0	0	0	0	0	0	1	0	0		0		0		0		0		0		0
2017-12-15	24113	1	1	juvenile	*	13	*	Private	Fecal sample	0	0	0	0	1	0	0	0	0	0	0	0	0	0	0	0	0	0	0	0	0	0	0	0	0	1	0	0		0		0		0		0		0		0
2018-01-04	38381	*	*	adult	0	*	*	Private	Fecal sample	0	0	0	0	1	0	0	0	0	0	0	0	0	0	0	0	0	0	0	0	0	0	0	0	0	1	0	0		0		0		0		0		0		0
2018-01-04	38381	*	*	adult	1	*	*	Private	Fecal sample	0	0	0	0	1	0	0	0	0	0	0	0	0	0	0	0	0	0	0	0	0	0	0	0	0	1	0	0		0		0		0		0		0		0
2018-01-05	42657	*	*	adult	1	*	*	Private	Fecal sample	1	0	0	0	0	0	0	0	0	0	0	0	0	0	0	0	0	0	0	0	0	0	0	0	0	1	0	0		0		0		0		0		0		0
2018-01-05	42657	*	*	adult	0	*	*	Private	Fecal sample	1	0	0	0	0	0	0	0	0	0	0	0	0	0	0	0	0	0	0	0	0	0	0	0	0	1	0	0		0		0		0		0		0		0
2018-01-17	96237	*	*	adult	1	*	*	Private	Fecal sample	1	0	0	0	0	0	0	0	0	0	0	0	0	0	0	0	0	0	0	0	0	0	0	0	0	1	0	0		0		0		0		0		0		0
2018-01-22	28205	*	*	*	1	*	*	Veterinarian	Fecal sample	1	0	0	0	0	0	0	0	0	0	0	0	0	0	0	0	0	0	0	0	0	0	0	0	0	1	0	0		0		0		0		0		0		0
2018-01-23	45896	1	1	adult	1	*	*		Fecal sample	0	0	0	0	1	0	0	0	0	0	0	0	0	0	0	0	0	0	0	0	0	0	0	0	0	1	0	0		0		0		0		0		0		0
2018-01-24	41569	*	*	juvenile	1	*	*	Private	Fecal sample	0	0	0	0	1	0	0	0	0	0	0	0	0	0	0	0	0	0	0	0	0	0	0	0	0	1	0	0		0		0		0		0		0		0
2018-02-02	66333	1	1	adult	1	30	0.05	Private	Fecal sample	1	0	0	0	0	0	0	0	0	0	0	0	0	0	0	0	0	0	0	0	0	0	0	0	0	1	0	0		0		0		0		0		0		0
2018-02-22	28205	*	*	*	1	*	*	Veterinarian	Fecal sample	1	0	0	0	0	0	0	0	0	0	0	0	0	0	0	0	0	0	0	0	0	0	0	0	0	1	0	0		0		0		0		0		0		0
2018-03-06	86159	1	1	adult	1	35	0.18	Private	Fecal sample	0	0	0	0	1	0	0	0	0	0	0	0	0	0	0	0	0	0	0	0	0	0	0	0	0	1	0	0		0		0		0		0		0		0
2018-03-06	93413	1	1	adult	0	*	*	Private	Fecal sample	0	0	0	0	1	0	0	0	0	0	0	0	0	0	0	0	0	0	0	0	0	0	0	0	0	1	0	0		0		0		0		0		0		0
2018-03-06	28205	*	*	*	1	*	*	Veterinarian	Fecal sample	0	0	0	0	1	0	0	0	0	0	0	0	0	0	0	0	0	0	0	0	0	0	0	0	0	1	0	0		0		0		0		0		0		0
2018-03-06	28205	*	*	*	1	*	*	Veterinarian	Fecal sample	1	0	0	0	0	0	0	0	0	0	0	0	0	0	0	0	0	0	0	0	0	0	0	0	0	1	0	0		0		0		0		0		0		0
2018-03-28	65510	1	1	adult	1	*	0.25	Private	Fecal sample	1	0	0	0	0	0	0	0	0	0	0	0	0	0	0	0	0	0	0	0	0	0	0	0	0	1	0	0		0		0		0		0		0		0
2018-03-29	79395	1	1	adult	1	40	0.12	Private	Fecal sample	1	0	0	0	0	0	0	0	0	0	0	0	0	0	0	0	0	0	0	0	0	0	0	0	0	1	0	0		0		0		0		0		0		0
2018-04-06	89081	*	*	adult	1	*	*	Private	Fecal sample	1	0	0	0	0	0	0	0	0	0	0	0	0	0	0	0	0	0	0	0	0	0	0	0	0	1	0	0		0		0		0		0		0		0
2018-04-09	92637	1	1	juvenile	1	10	0.02	Private	Fecal sample	1	0	0	0	0	0	0	0	0	0	0	0	0	0	0	0	0	0	0	0	0	0	0	0	0	1	0	0		0		0		0		0		0		0
2018-04-17	55411	*	*	adult	0	*	*	Private	Fecal sample	0	0	0	0	0	0	0	0	0	0	0	0	0	0	0	0	0	0	0	0	0	0	0	0	1	0	1	2		0		0		0		0		0		0
2018-04-18	40699	1	1	adult	1	38	0.23	Private	Fecal sample	1	0	0	0	0	0	0	0	0	0	0	0	0	0	0	0	0	0	0	0	0	0	0	0	0	1	0	0		0		0		0		0		0		0
2018-04-19	85293	*	*	adult	*	*	*	Private	Fecal sample	0	0	0	0	0	0	0	1	0	0	0	0	0	0	0	0	0	0	0	0	0	0	0	0	0	1	0	0		0		0		0		0		0		0
2018-04-24	28205	*	*	*	0	*	*	Veterinarian	Fecal sample	0	0	0	0	0	0	0	0	1	0	0	0	0	0	0	0	0	0	0	0	0	0	0	0	0	0	0	0		0		0		0		0		0		0
2018-04-26	41569	*	*	juvenile	1	*	*	Private	Fecal sample	0	0	0	0	1	0	0	0	0	0	0	0	0	0	0	0	0	0	0	0	0	0	0	0	0	1	0	0		0		0		0		0		0		0
2018-04-27	28205	*	*	*	1	*	*	Veterinarian	Fecal sample	0	0	0	0	1	0	0	0	0	0	0	0	0	0	0	0	0	0	0	0	0	0	0	0	0	1	0	0		0		0		0		0		0		0
2018-05-02	67549	*	*	adult	1	*	*	Private	Fecal sample	1	0	0	0	0	0	0	0	0	0	0	0	0	0	0	0	0	0	0	0	0	0	0	0	0	1	0	0		0		0		0		0		0		0
2018-05-03	79108	1	1	juvenile	1	*	*	Private	Fecal sample	0	0	0	0	1	0	0	0	0	0	0	0	0	0	0	0	0	0	0	0	0	0	0	0	0	1	0	0		0		0		0		0		0		0
2018-05-07	91227	*	*	adult	1	*	*	Veterinarian	Fecal sample	1	0	0	0	0	0	0	0	0	0	0	0	0	0	0	0	0	0	0	0	0	0	0	0	0	0	0	0		0		0		0		0		0		0
2018-05-09	1728	*	*	*	0	*	*	Veterinarian	Fecal sample	0	0	0	0	0	0	0	0	0	0	0	0	0	0	0	0	0	0	0	0	0	0	0	0	1	0	0	0		0		0		0		0		0		0
2018-05-14	57072	1	1	adult	1	13	*	Private	Fecal sample	0	0	0	0	1	0	0	0	0	0	0	0	0	0	0	0	0	0	0	0	0	0	0	0	0	0	1	2		0		0		0		0		0		0
2018-06-07	28205	*	*	*	0	*	*	Veterinarian	Fecal sample	0	0	0	0	1	0	0	0	0	0	0	0	0	0	0	0	0	0	0	0	0	0	0	0	0	1	0	0		0		0		0		0		0		0
2018-06-08	28105	*	*	*	1	*	*	Zoo	Fecal sample	1	0	0	0	0	0	0	0	0	0	0	0	0	0	0	0	0	0	0	0	0	0	0	0	0	1	0	0		0		0		0		0		0		0
2018-06-21	71701	*	*	juvenile	1	*	*		Fecal sample	0	0	0	0	1	0	0	0	0	0	0	0	0	0	0	0	0	0	0	0	0	0	0	0	0	0	1	2		0		0		0		0		0		0
2018-06-29	54298	*	*	adult	1	44	0.22	Private	Fecal sample	1	0	0	0	0	0	0	0	0	0	0	0	0	0	0	0	0	0	0	0	0	0	0	0	0	1	0	0		0		0		0		0		0		0
2018-06-29	48249	1	1	adult	1	*	0.15	Private	Fecal sample	1	0	0	0	0	0	0	0	0	0	0	0	0	0	0	0	0	0	0	0	0	0	0	0	0	0	0	0		0		0		0		0	1	2		0
2018-06-29	86956	1	1	adult	1	*	*	Private	Fecal sample	0	0	0	0	1	0	0	0	0	0	0	0	0	0	0	0	0	0	0	0	0	0	0	0	0	1	0	0		0		0		0		0		0		0
2018-07-10	30163	1	1	adult	1	17.5	0.13	Private	Fecal sample	0	0	0	0	0	0	0	0	0	0	1	0	0	0	0	0	0	0	0	0	0	0	0	0	0	1	0	0		0		0		0		0		0		0
2018-07-24	80937	*	*	adult	1	20	0.13	Private	Fecal sample	1	0	0	0	0	0	0	0	0	0	0	0	0	0	0	0	0	0	0	0	0	0	0	0	0	1	0	0		0		0		0		0		0		0
2018-07-30	53859	*	*	adult	0	*	*	Private	Fecal sample	1	0	0	0	0	0	0	0	0	0	0	0	0	0	0	0	0	0	0	0	0	0	0	0	0	1	0	0		0		0		0		0		0		0
2018-08-08	71088	*	*	adult	1	*	*	Private	Fecal sample	1	0	0	0	0	0	0	0	0	0	0	0	0	0	0	0	0	0	0	0	0	0	0	0	0	1	0	0		0		0		0		0		0		0
2018-08-11	53844	*	*	adult	1	30	0.11	Private	Fecal sample	0	0	0	0	1	0	0	0	0	0	0	0	0	0	0	0	0	0	0	0	0	0	0	0	0	1	0	0		0		0		0		0		0		0
2018-08-27	96199	*	*	adult	1	*	*	Private	Fecal sample	0	0	0	0	0	0	0	0	0	0	0	0	0	0	0	0	0	0	0	0	0	0	0	0	1	0	0	0		0		0		0		0		0		0
2018-08-29	76829	1	1	*	1	*	*	Zoo	Fecal sample	1	0	0	0	0	0	0	0	0	0	0	0	0	0	0	0	0	0	0	0	0	0	0	0	0	1	0	0		0		0		0		0		0		0
2018-08-31	28219	1	1	adult	0	10	*	Private	Fecal sample	0	0	0	0	0	0	0	0	1	0	0	0	0	0	0	0	0	0	0	0	0	0	0	0	0	0	0	0		0		0		0		0		0		0
2018-09-05	97332	*	*	adult	1	*	*	Private	Fecal sample	0	0	0	0	1	0	0	0	0	0	0	0	0	0	0	0	0	0	0	0	0	0	0	0	0	0	0	0		0		0		0		0	1	1		0
2018-09-12	1824	*	*	adult	1	*	*	Private	Fecal sample	0	0	0	0	0	0	0	0	0	0	0	0	0	0	0	0	0	0	0	0	0	0	0	0	1	1	0	0		0		0		0		0		0		0
2018-09-13	48249	*	*	adult	1	*	0.15	Private	Fecal sample	1	0	0	0	0	0	0	0	0	0	0	0	0	0	0	0	0	0	0	0	0	0	0	0	0	1	0	0		0		0		0		0		0		0
2018-09-18	42579	1	*	adult	1	*	*	Private	Fecal sample	1	0	0	0	0	0	0	0	0	0	0	0	0	0	0	0	0	0	0	0	0	0	0	0	0	0	0	0		0		0		0		0		0		0
2018-10-04	50735	*	*	*	*	*	*	Zoo	Fecal sample	1	0	0	0	0	0	0	0	0	0	0	0	0	0	0	0	0	0	0	0	0	0	0	0	0	1	0	0		0		0		0		0		0		0
2018-10-11	28105	*	*	*	0	*	*	Private	Fecal sample	0	0	0	0	0	0	0	0	1	0	0	0	0	0	0	0	0	0	0	0	0	0	0	0	0	0	0	0		0		0		0		0		0		0
2018-10-16	94051	*	*	adult	1	*	*	Private	Fecal sample	1	0	0	0	0	0	0	0	0	0	0	0	0	0	0	0	0	0	0	0	0	0	0	0	0	1	0	0		0		0		0		0		0		0
2018-10-16	49808	*	*	*	*	*	*	Private	Fecal sample	1	0	0	0	0	0	0	0	0	0	0	0	0	0	0	0	0	0	0	0	0	0	0	0	0	1	0	0		0		0		0		0		0		0
2018-10-19	97332	*	*	adult	1	*	*	Private	Fecal sample	0	0	0	0	1	0	0	0	0	0	0	0	0	0	0	0	0	0	0	0	0	0	0	0	0	1	0	0		0		0		0		0		0		0
2018-10-23	9117	1	1	adult	1	35	0.22	Private	Fecal sample	0	0	0	0	0	0	0	0	0	0	0	0	0	0	0	0	0	0	0	0	0	0	0	0	1	1	0	0		0		0		0		0		0		0
2018-10-24	31515	*	*	adult	0	*	*	Private	Fecal sample	0	0	0	0	1	0	0	0	0	0	0	0	0	0	0	0	0	0	0	0	0	0	0	0	0	1	0	0		0		0		0		0		0		0
2018-10-25	40764	1	1	adult	1	*	0.14	Private	Fecal sample	1	0	0	0	0	0	0	0	0	0	0	0	0	0	0	0	0	0	0	0	0	0	0	0	0	0	1	1		0		0		0		0		0		0
2018-11-07	74348	1	1	juvenile	1	*	*	Private	Fecal sample	1	0	0	0	0	0	0	0	0	0	0	0	0	0	0	0	0	0	0	0	0	0	0	0	0	0	1	2		0		0		0		0		0		0
2018-11-09	27639	1	1	adult	1	*	*	Private	Fecal sample	1	0	0	0	0	0	0	0	0	0	0	0	0	0	0	0	0	0	0	0	0	0	0	0	0	1	0	0		0		0		0		0		0		0
2018-12-21	25551	1	1	adult	1	40	0.13	Private	Fecal sample	1	0	0	0	0	0	0	0	0	0	0	0	0	0	0	0	0	0	0	0	0	0	0	0	0	0	0	0		0		0		0		0		0		0
2019-01-15	79194	1	1	*	0	30	0.2	Private	Fecal sample	0	0	0	0	1	0	0	0	0	0	0	0	0	0	0	0	0	0	0	0	0	0	0	0	0	0	0	0		0		0	1	2		0		0		0
2019-01-22	57223	1	1	adult	1	30	*	Private	Fecal sample	0	0	0	0	1	0	0	0	0	0	0	0	0	0	0	0	0	0	0	0	0	0	0	0	0	0	1	2		0		0		0		0		0		0
2019-01-30	92421	1	1	juvenile	1	*	*	Private	Fecal sample	0	0	0	0	1	0	0	0	0	0	0	0	0	0	0	0	0	0	0	0	0	0	0	0	0	1	0	0		0		0		0		0		0		0
2019-02-14	97332	*	*	adult	1	*	*	Private	Fecal sample	0	0	0	0	1	0	0	0	0	0	0	0	0	0	0	0	0	0	0	0	0	0	0	0	0	1	0	0		0		0		0		0		0		0
2019-02-20	2943	1	1	juvenile	1	15	0.02	Private	Fecal sample	0	0	0	0	1	0	0	0	0	0	0	0	0	0	0	0	0	0	0	0	0	0	0	0	0	0	0	0		0		0		0		0		0		0
2019-03-01	42549	1	1	adult	1	15	*	Private	Fecal sample	1	0	0	0	0	0	0	0	0	0	0	0	0	0	0	0	0	0	0	0	0	0	0	0	0	1	0	0		0		0		0		0		0		0
2019-03-13	4416	*	*	adult	1	*	*	Private	Fecal sample	1	0	0	0	0	0	0	0	0	0	0	0	0	0	0	0	0	0	0	0	0	0	0	0	0	1	0	0		0		0		0		0		0		0
2019-03-15	99970	*	*	juvenile	*	*	*	Private	Fecal sample	0	0	0	0	0	0	0	0	0	0	1	0	0	0	0	0	0	0	0	0	0	0	0	0	0	1	0	0		0		0		0		0		0		0
2019-04-01	97332	*	*	adult	1	*	*	Private	Fecal sample	0	0	0	0	1	0	0	0	0	0	0	0	0	0	0	0	0	0	0	0	0	0	0	0	0	1	0	0		0		0		0		0		0		0
2019-04-02	83339	1	1	adult	1	*	*	Private	Fecal sample	1	0	0	0	0	0	0	0	0	0	0	0	0	0	0	0	0	0	0	0	0	0	0	0	0	1	0	0		0		0		0		0		0		0
2019-04-12	40670	1	1	adult	1	18	0.2	Private	Fecal sample	1	0	0	0	0	0	0	0	0	0	0	0	0	0	0	0	0	0	0	0	0	0	0	0	0	1	0	0		0		0		0		0		0		0
2019-04-24	6820	1	1	adult	1	32	0.12	Private	Fecal sample	1	0	0	0	0	0	0	0	0	0	0	0	0	0	0	0	0	0	0	0	0	0	0	0	0	0	0	0		0		0		0		0		0		0
2019-05-03	10559	*	*	*	*	*	*	Private	Fecal sample	0	0	0	0	0	0	0	0	0	0	0	0	0	0	0	0	0	0	0	0	0	0	0	0	1	0	0	0		0		0		0		0		0		0
2019-05-07	97332	*	*	adult	1	*	*	Private	Fecal sample	0	0	0	0	1	0	0	0	0	0	0	0	0	0	0	0	0	0	0	0	0	0	0	0	0	1	0	0		0		0		0		0		0		0
2019-05-09	28205	*	*	*	1	*	*	Veterinarian	Fecal sample	1	0	0	0	0	0	0	0	0	0	0	0	0	0	0	0	0	0	0	0	0	0	0	0	0	1	0	0		0		0		0		0		0		0
2019-05-24	1796	*	*	juvenile	1	*	*	Private	Fecal sample	1	0	0	0	0	0	0	0	0	0	0	0	0	0	0	0	0	0	0	0	0	0	0	0	0	1	0	0		0		0		0		0		0		0
2019-05-28	38259	*	*	adult	1	*	*	Private	Fecal sample	1	0	0	0	0	0	0	0	0	0	0	0	0	0	0	0	0	0	0	0	0	0	0	0	0	1	0	0		0		0		0		0		0		0
2019-05-29	13127	*	*	*	1	*	*	Veterinarian	Fecal sample	1	0	0	0	0	0	0	0	0	0	0	0	0	0	0	0	0	0	0	0	0	0	0	0	0	0	0	0		0		0		0		0	1	1		0
2019-06-13	47137	*	*	adult	1	*	*	Private	Fecal sample	0	0	0	0	1	0	0	0	0	0	0	0	0	0	0	0	0	0	0	0	0	0	0	0	0	1	0	0		0		0		0		0		0		0
2019-06-14	44534	*	*	juvenile	0	*	*	Private	Fecal sample	0	0	0	0	1	0	0	0	0	0	0	0	0	0	0	0	0	0	0	0	0	0	0	0	0	1	0	0		0		0		0		0		0		0
2019-06-18	30916	*	*	*	1	*	*	Private	Fecal sample	0	0	0	0	1	0	0	0	0	0	0	0	0	0	0	0	0	0	0	0	0	0	0	0	0	1	0	0		0		0		0		0		0		0
2019-06-24	39326	1	1	adult	1	*	*	Private	Fecal sample	0	0	0	0	1	0	0	0	0	0	0	0	0	0	0	0	0	0	0	0	0	0	0	0	0	0	1	3		0		0		0		0		0		0
2019-07-10	56751	*	*	adult	1	*	*	Private	Fecal sample	0	0	0	0	0	0	0	0	0	0	1	0	0	0	0	0	0	0	0	0	0	0	0	0	0	1	0	0		0		0		0		0		0		0
2019-07-15	56179	1	1	adult	1	45	*	Private	Fecal sample	1	0	0	0	0	0	0	0	0	0	0	0	0	0	0	0	0	0	0	0	0	0	0	0	0	1	0	0		0		0		0		0		0		0
2019-07-15	97332	*	*	adult	1	*	*	Private	Fecal sample	0	0	0	0	1	0	0	0	0	0	0	0	0	0	0	0	0	0	0	0	0	0	0	0	0	1	0	0		0		0		0		0		0		0
2019-07-19	82166	1	1	adult	1	30	0.1	Private	Fecal sample	1	0	0	0	0	0	0	0	0	0	0	0	0	0	0	0	0	0	0	0	0	0	0	0	0	1	0	0		0		0		0		0		0		0
2019-07-31	29229	1	1	juvenile	1	25	*	Private	Fecal sample	1	0	0	0	0	0	0	0	0	0	0	0	0	0	0	0	0	0	0	0	0	0	0	0	0	0	1	1		0		0		0		0		0		0
2019-07-31	97332	*	*	adult	1	*	*	Private	Fecal sample	0	0	0	0	1	0	0	0	0	0	0	0	0	0	0	0	0	0	0	0	0	0	0	0	0	1	0	0		0		0		0		0		0		0
2019-07-31	51149	*	*	adult	1	*	*	Private	Fecal sample	1	0	0	0	0	0	0	0	0	0	0	0	0	0	0	0	0	0	0	0	0	0	0	0	0	1	0	0		0		0		0		0		0		0
2019-09-13	72820	1	1	adult	1	*	*	Private	Fecal sample	0	0	0	0	1	0	0	0	0	0	0	0	0	0	0	0	0	0	0	0	0	0	0	0	0	1	0	0		0		0		0		0		0		0
2019-09-23	9217	1	1	juvenile	1	*	*	Private	Fecal sample	1	0	0	0	0	0	0	0	0	0	0	0	0	0	0	0	0	0	0	0	0	0	0	0	1	1	0	0		0		0		0		0		0		0
2019-11-26	92637	1	1	adult	1	*	*	Private	Fecal sample	0	0	0	0	0	0	0	0	0	0	0	0	0	0	0	0	0	0	0	0	0	0	0	0	1	1	0	0		0		0		0		0		0		0
									Summe	250	1	5	6	232	0	10	12	5	1	23	1	2	1	2	6	1	1	0	1	2	3	0	2	103	447	95		1		7				2		9		1
Gastrointestinal protozoan and helminth parasite infections in captive chameleons in Germany
Paula Sapion Miranda1,2*, Anja Taubert1, Carlos Hermosilla1, Malek J. Hallinger2
1Institute of Parasitology, Justus Liebig University Giessen, Giessen, Germany
2exomed GmbH, Marburg, Germany
* Correspondence:
Corresponding Author
paula.sapion.miranda@vetmed.uni-giessen.de
Parasitology Research
[truncated: 39 more columns]
