# Supplementary material
Source: Research Square preprint supplement (doi:10.21203/rs.3.rs-8902969/v1)
Supplement: Supplementary file 2 [file 5dcefbe4dc020e6b17f5f2bd.xlsx]

## Sheet: Necropsies
Date	ZIP Code	Number of animals (1=Singel, 2=Grp)	Husbandry (Terrarium 1, Outdoors 0)	Age	Sex (m=1, w=0)	lenght (cm)	mass (kg)	Sample	F. pardialis	F. lateralis	C. calyptratus	C. cristatus	T. melleri	T. hoehnelii	Calumna parsonii	B. thamnobates	Dreihornchamäleon (Trioceros jacksonii)	Triocerus deremensis	ch. j. xantholophus	unknown Species	negative	Oxyurid nematode	Physalopteroides (Physaloptera ortleppi)	Isospora jaracimmani	Isospora sp.	Choleoeimeria sp.	unsp. Coccidia	Ascarids	thin shelled Nematodeneggs	Strongyloides	Trematode eggs	Cestode	Cryptosporidium	Trichomonas	Tritrichomonas sp.	Proteromonas sp.	Monocercomonas sp.	Leptomonas sp.	Choleo-Eimeria	Hexametra sp.	Flagelattenzysten	Spinicauda sp. (Heterakiden)	Heterakids	Amoeba	Filaria (Foleyella furcata)	Pentastomiden	Karbolfuchsin Cryto	IFAT Crypto	ELISA Crypto
2012-01-04	13051	*	*	*	0	*	*	Necropsy	0	0	0	1	0	0	0	0	0	0	0	0	1	0	0	0	0	0	0	0	0	0	0	0	0	0	0	0	0	0	0	0	0	0	0	0	0	0	*	*	*
2012-01-11	66763	*	*	juvenile	1	*	*	Necropsy	1	0	0	0	0	0	0	0	0	0	0	0	1	0	0	0	0	0	0	0	0	0	0	0	0	0	0	0	0	0	0	0	0	0	0	0	0	0	*	*	*
2012-01-17	69254	1	1	adult	0	17.3	0.14	Necropsy	1	0	0	0	0	0	0	0	0	0	0	0	1	0	0	0	0	0	0	0	0	0	0	0	0	0	0	0	0	0	0	0	0	0	0	0	0	0	*	*	*
2012-01-20	2957	1	*	juvenile	1	*	*	Necropsy	1	0	0	0	0	0	0	0	0	0	0	0	1	0	0	0	0	0	0	0	0	0	0	0	0	0	0	0	0	0	0	0	0	0	0	0	0	0	*	*	*
2012-03-15	50735	1	Zoo	adult	0	*	*	Necropsy	1	0	0	0	0	0	0	0	0	0	0	0	0	0	0	0	0	0	0	0	0	0	0	0	0	0	3	0	0	3	0	3	0	0	0	0	3	0	*	*	*
2012-07-06	72475	1	1	juvenile	0	*	*	Necropsy	1	0	0	0	0	0	0	0	0	0	0	0	0	0	0	0	0	0	4	0	0	0	0	0	0	0	0	0	0	0	0	0	0	0	0	0	0	0	*	*	*
2013-02-05	72475	*	*	juvenile	1	*	*	Necropsy	1	0	0	0	0	0	0	0	0	0	0	0	0	0	0	0	3	0	0	0	0	0	0	0	0	0	0	0	0	0	0	0	0	0	0	0	0	0	*	*	*
2013-03-04	80993	*	*	juvenile	1	*	0.01	Necropsy	0	0	1	0	0	0	0	0	0	0	0	0	0	3	0	0	0	0	0	0	0	0	0	0	0	0	0	0	0	0	0	0	0	0	0	0	0	0	*	*	*
2013-03-08	4610	*	*	adult	1	*	*	Necropsy	0	0	1	0	0	0	0	0	0	0	0	0	0	0	0	0	0	0	0	0	0	0	0	0	0	0	0	3	0	0	0	0	0	0	0	0	0	0	*	*	*
2013-04-11	72475	*	*	adult	1	*	*	Necropsy	0	0	0	0	1	0	0	0	0	0	0	0	0	0	0	0	0	0	0	0	0	0	0	0	0	0	0	3	0	0	0	0	0	0	0	0	0	0	*	*	*
2013-08-28	72475	1	1	adult	1	*	*	Necropsy	0	0	0	0	0	0	0	0	0	1	0	0	0	2	0	0	0	0	0	0	0	0	0	0	0	0	0	0	0	0	0	0	0	0	0	0	0	0	*	*	*
2013-12-20	12681	*	*	*	0	*	*	Necropsy	0	1	0	0	0	0	0	0	0	0	0	0	1	0	0	0	0	0	0	0	0	0	0	0	0	0	0	0	0	0	0	0	0	0	0	0	0	0	*	*	*
2014-02-26	63071	*	*	adult	1	*	*	Necropsy	1	0	0	0	0	0	0	0	0	0	0	0	0	0	0	0	0	3	0	0	0	0	0	0	0	0	0	0	0	0	0	0	0	0	0	0	0	0	*	*	*
2016-01-12	31228	*	*	adult	0	*	*	Necropsy	0	0	0	0	0	1	0	0	0	0	0	0	1	0	0	0	0	0	0	0	0	0	0	0	0	0	0	0	0	0	0	0	0	0	0	0	0	0	*	*	*
2016-02-18	79183	*	*	*	1	*	*	Necropsy	0	0	0	0	1	0	0	0	0	0	0	0	0	0	0	0	0	0	3	0	0	0	0	0	0	0	0	0	0	0	3	0	0	0	0	0	0	0	*	*	*
2016-02-22	79183	1	*	adult	1	17.3	0.087	Necropsy	0	0	0	0	1	0	0	0	0	0	0	0	0	0	0	0	0	0	0	0	0	0	0	0	0	0	0	0	0	0	3	0	0	0	0	0	0	0	*	*	*
2016-06-24	79183	1	1	juvenile	1	*	*	Necropsy	0	0	1	0	0	0	0	0	0	0	0	0	1	0	0	0	0	0	0	0	0	0	0	0	0	0	0	0	0	0	0	0	0	0	0	0	0	0	*	*	*
2016-06-24	89312	*	*	juvenile	1	9.6	15.4	Necropsy	1	0	0	0	0	0	0	0	0	0	0	0	0	0	0	0	3	0	0	0	0	0	0	0	0	0	0	0	0	0	0	0	0	0	0	0	0	0	*	*	*
2016-08-02	50735	1	1	adult	2	11.8	0.0409	Necropsy	1	0	0	0	0	0	0	0	0	0	0	0	0	0	0	0	0	0	0	0	0	0	0	0	0	2	0	0	0	3	0	0	0	0	0	0	0	0	*	*	*
2016-10-17	63454	*	*	adult	2	22.6	0.309	Necropsy	0	0	0	0	0	0	1	0	0	0	0	0	0	0	0	0	0	0	0	0	0	1	0	0	0	0	0	0	0	0	0	0	0	0	0	0	0	0	*	*	*
2016-10-20	48161	*	Zoo	adult	1	13.8	83.9	Necropsy	0	0	0	0	0	0	0	0	1	0	0	0	1	0	0	0	0	0	0	0	0	0	0	0	0	0	0	0	0	0	0	0	0	0	0	0	0	0	*	*	*
2016-10-27	12051	*	*	adult	1	15.4	0.0759	Necropsy	0	0	0	0	0	0	0	0	0	0	1	0	0	0	0	0	0	0	0	0	0	0	0	0	0	2	0	0	0	3	0	0	0	0	0	0	0	0	*	*	*
2016-11-24	79183	2	*	juvenile	1	*	*	Necropsy	0	0	1	0	0	0	0	0	0	0	0	0	1	0	0	0	0	0	0	0	0	0	0	0	0	0	0	0	0	0	0	0	0	0	0	0	0	0	*	*	*
2017-09-12	50735	*	Zoo	*	0	*	*	Necropsy	1	0	0	0	0	0	0	0	0	0	0	0	1	0	0	0	0	0	0	0	0	0	0	0	0	0	0	0	0	0	0	0	0	0	0	0	0	0	*	*	*
2018-03-13	67112	*	*	adult	0	*	*	Necropsy	0	0	0	0	0	0	0	0	0	0	0	1	0	0	0	0	0	0	0	0	0	0	0	0	0	0	0	0	0	0	0	0	0	0	3	0	0	0	*	*	*
2018-03-29	67112	*	*	adult	1	*	*	Necropsy	0	0	0	0	0	0	0	1	0	0	0	0	0	0	0	0	0	0	0	0	0	0	0	0	0	0	0	0	0	0	0	0	0	3	0	0	0	0	*	*	*
2018-05-22	42117	*	*	*	1	*	*	Necropsy	1	0	0	0	0	0	0	0	0	0	0	0	0	0	0	0	0	0	0	0	0	0	0	0	0	2	0	3	0	0	0	0	0	0	0	0	0	0	*	*	*
2013-08-16	50735	1	Zoo	adult	1	19.7	0.12	Necropsy	1	0	0	0	0	0	0	0	0	0	0	0	1	0	0	0	0	0	0	0	0	0	0	0	0	0	0	0	0	0	0	0	0	0	0	0	0	0	*	*	*
2014-05-22	50735	1	Zoo	*	0	14.2	0.03	Necropsy	0	0	1	0	0	0	0	0	0	0	0	0	0	3	0	0	0	0	0	0	0	0	0	0	0	0	0	0	0	0	0	0	0	0	0	0	0	0	*	*	*
2013-08-08	66763	1	1	*	0	13	0.05	Necropsy	1	0	0	0	0	0	0	0	0	0	0	0	1	0	0	0	0	0	0	0	0	0	0	0	0	0	0	0	0	0	0	0	0	0	0	0	0	0	*	*	*
2018-07-26	39126	*	*	adult	0	*	*	Necropsy	0	0	1	0	0	0	0	0	0	0	0	0	0	2	0	0	2	0	0	0	0	0	0	0	0	0	0	0	0	0	0	0	0	0	0	0	0	0	*	*	*
									13	1	6	1	3	1	1	1	1	1	1	1	12	10	0	0	8	3	7	0	0	1	0	0	0	6	3	9	0	9	6	3	0	3	3	0	3	0	0	0	0
Gastrointestinal protozoan and helminth parasite infections in captive chameleons in Germany
Paula Sapion Miranda1,2*, Anja Taubert1, Carlos Hermosilla1, Malek J. Hallinger2
1Institute of Parasitology, Justus Liebig University Giessen, Giessen, Germany
2exomed GmbH, Marburg, Germany
* Correspondence:
Corresponding Author
paula.sapion.miranda@vetmed.uni-giessen.de
Parasitology Research
2013-09-19	50735	*	*	*	1	*	*	Sektion	0	0	1	0	0	0	0	0	0	0	0	0	0	0	0		1	3		0		0	0		0	0		0		0		0		0		0		0	0		0
2014-09-19	40227	*	*	1.5	0	*	*	Kotprobe	0	0	0	0	0	0	1	0	0	0	0	0	0	0	0			0		0		0	0		0	0		0	1	3		0		0		0		0	0		0
2016-06-22	96052	*	*	0.5	1	9.4	0.0124	Kotprobe	0	0	1	0	0	0	0	0	0	0	0	0	0	0	0			0	1	3		0	0		0	0		0		0		0		0		0		0	2		0
2013-11-18	14822	1	*	*	1	*	*	Sektion	0	0	0	0	0	0	0	0	0	0	0	0	0	0	0	0	0	0	0	0	0	0	0	0	0	0	0	0	0	0	0	0	0	0	0	0	0	0	*	*	*
[truncated: 23 more columns]
